# Supplementary material for: Copper and manganese co-mediated cascade aza-Michael addition/cyclization and azidation of 1,3-enynes: regioselective synthesis of fully substituted azido pyrroles
Source: Royal Society of Chemistry journal article supplement (doi:10.1039/d0ob01927e), 2020-01-01

# Supporting Information

## **Copper and manganese co-mediated cascade aza-Michael addition/cyclization and azidation of 1,3-enynes: Regioselective synthesis of fully-substituted azido pyrroles**

Junying Ge, Qiuping Ding,\* Man Yang, Tian He, Yiyuan Peng

*Key Laboratory of Functional Small Organic Molecules, Ministry of Education, Jiangxi  
Key Laboratory of Green Chemistry, and College of Chemistry & Chemical  
Engineering, Jiangxi Normal University, Nanchang, Jiangxi 330022, China.*

|                                             |           |
|---------------------------------------------|-----------|
| <b>1. X-ray Crystallography Data of 4a</b>  | <b>S2</b> |
| <b>2. Experimental Procedures</b>           | <b>S4</b> |
| <b>3. NMR Spectra for Compounds 4 and 5</b> | <b>S6</b> |

## 1. X-ray Crystallography Data of 4a

The crystal of **4a** was slowly grown by evaporation of the solvents (a mixture of Ethyl acetate/ petroleum ether = 1:10 in volume) at room temperature in the air.

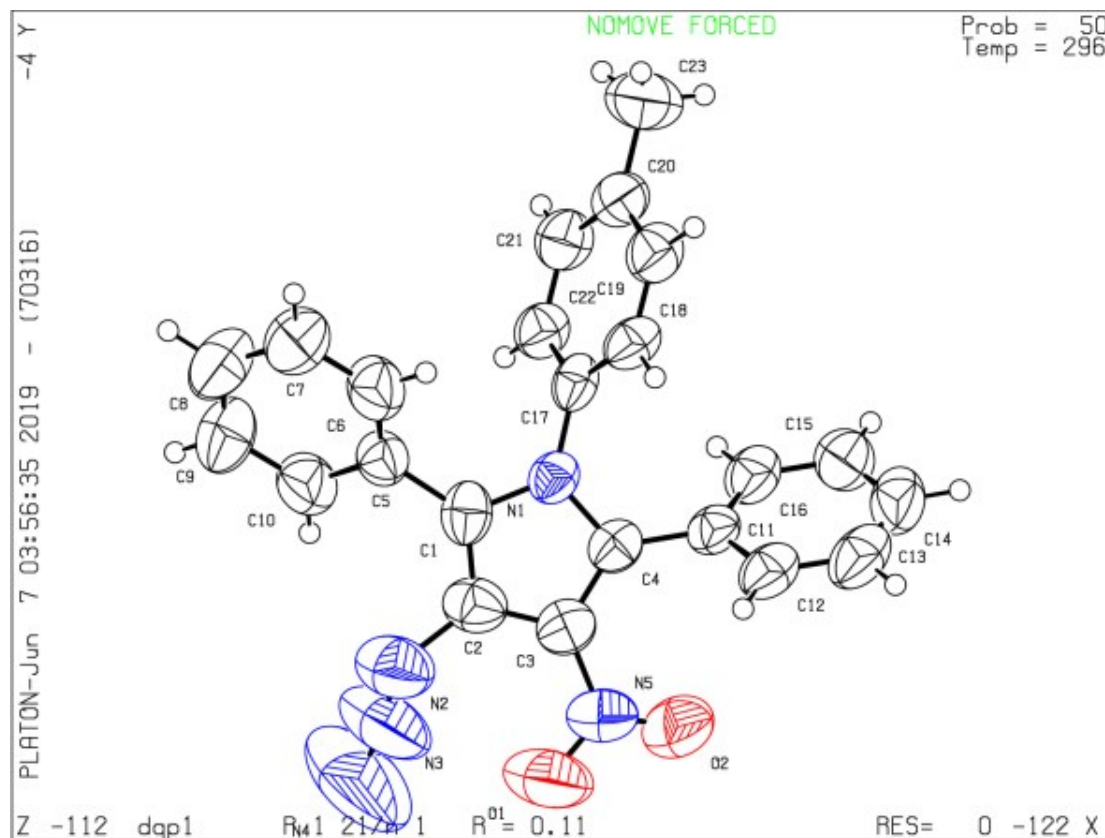

Crystal data and structure refinement of product **4a**

CCDC Number 1962959

Compound Name 3-azido-4-nitro-2,5-diphenyl-1-(p-tolyl)-1H-pyrrole

Empirical formula  $C_{23}H_{17}N_5O_2$

Formula weight 395.42

Temperature 296(2) K

Wavelength 0.71073 Å

Crystal system, space group Monoclinic,  $P2(1)/n$

Unit cell dimensions  
a = 11.158(2) Å    alpha = 90 deg.  
b = 11.434(2) Å    beta = 96.925(4) deg.  
c = 15.708(3) Å    gamma = 90 deg.

|                                   |                                             |
|-----------------------------------|---------------------------------------------|
| Volume                            | 1989.4(6) Å <sup>3</sup>                    |
| Z, Calculated density             | 4, 1.320 Mg/m <sup>3</sup>                  |
| Absorption coefficient            | 0.088 mm <sup>-1</sup>                      |
| F(000)                            | 824                                         |
| Crystal size                      | 0.20 x 0.20 x 0.20 mm                       |
| Theta range for data collection   | 2.21 to 25.10 deg.                          |
| Limiting indices                  | -13 ≤ h ≤ 8, -13 ≤ k ≤ 13, -18 ≤ l ≤ 18     |
| Reflections collected / unique    | 9906 / 3518 [R(int) = 0.0265]               |
| Completeness to theta = 25.10     | 99.4 %                                      |
| Absorption correction             | Semi-empirical from equivalents             |
| Max. and min. transmission        | 0.9826 and 0.9826                           |
| Refinement method                 | Full-matrix least-squares on F <sup>2</sup> |
| Data / restraints / parameters    | 3518 / 0 / 272                              |
| Goodness-of-fit on F <sup>2</sup> | 1.160                                       |
| Final R indices [I > 2σ(I)]       | R1 = 0.1017, wR2 = 0.2944                   |
| R indices (all data)              | R1 = 0.1534, wR2 = 0.3298                   |
| Largest diff. peak and hole       | 0.627 and -0.412 e.Å <sup>-3</sup>          |

## 2. Experimental Procedures

2.1 General procedure for Preparing Conjugated 1,3-Enyne **1** According to the Reference<sup>1-4</sup>

2.2 Experiments of Radical Inhibition

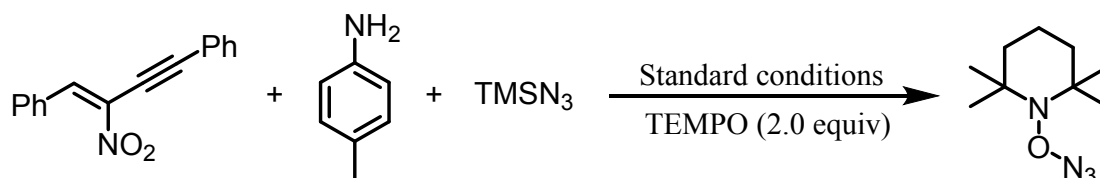

To an oven-dried Schlenk tube were added 1,3-enyne **1a** (0.1 mmol, 25 mg), 4-methylaniline **2a** (0.11 mmol, 11.8 mg), MnCl<sub>2</sub> (10 mol%, 1.3 mg), Cu(OAc)<sub>2</sub>·H<sub>2</sub>O (0.2 mmol, 40.0 mg), CH<sub>3</sub>CN (1.0 mL), TMSN<sub>3</sub> (0.3 mmol, 40 μL) and TEMPO (0.2 mmol, 31.3 mg) under air atmosphere. The mixture was stirred at room temperature for 20 min. The reaction mixture was detected by GC-MS measurement.

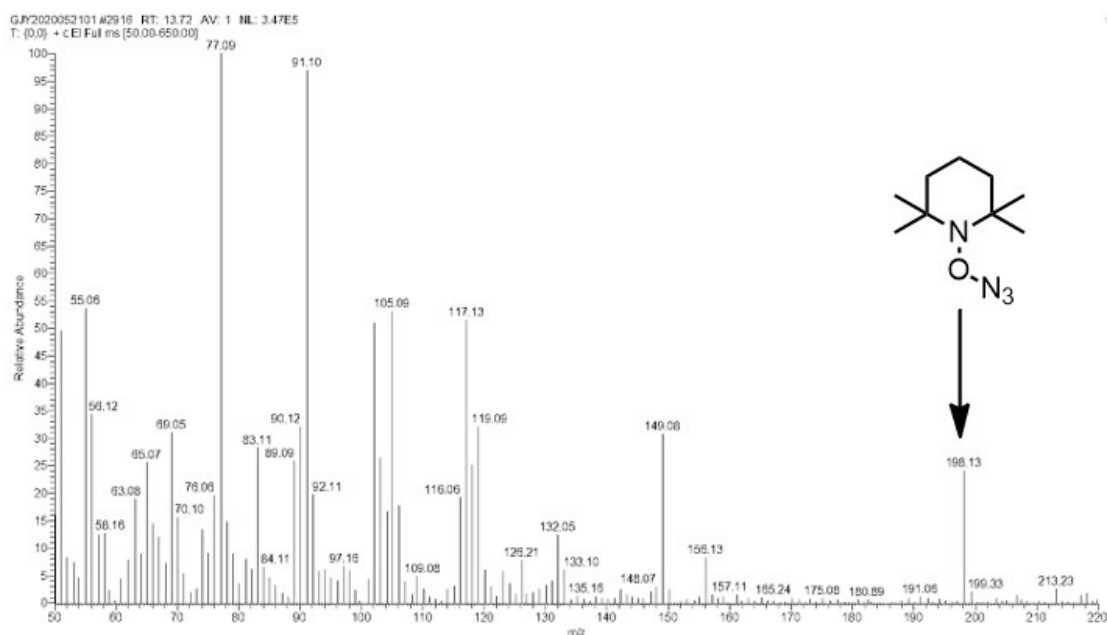

2.3 Gram scale experiment for the synthesis of **4a**

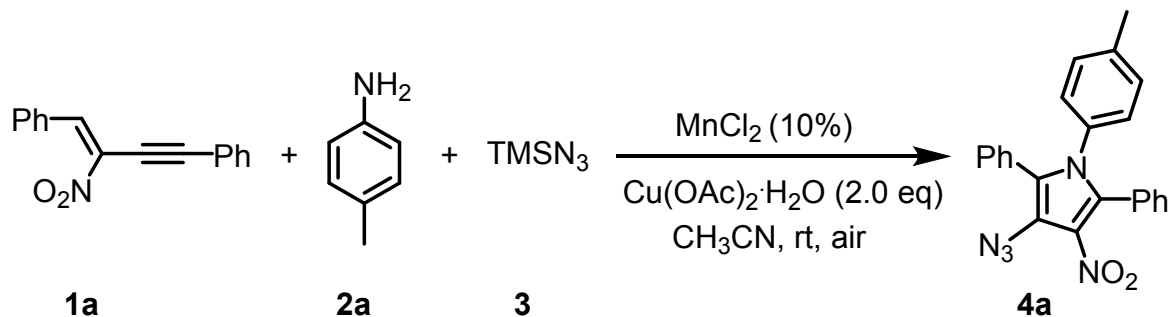

To an oven-dried 100 mL round-bottomed flask was charged with 1,3-enyne **1a** (0.3 g, 1.2 mmol), 4-methylaniline **2a** (0.142 g, 1.32 mmol), manganese chloride (15.1

mg, 10 mol%), copper acetate monohydrate (0.48 g, 2.4 mmol), acetonitrile (12 mL), trimethylsilylazide TMSN<sub>3</sub> **3** (480 μL, 3.6 mmol) under air atmosphere. The mixture was stirred at room temperature. After the reaction was accomplished (detected by TLC), the mixture was leached through diatomite. The solvent was removed under reduced pressure, and the residue was purified by flash column chromatography on basic silica gel (PE / EA = 40/1) to afford product **4a** 0.28 g (59% yield).

#### References:

- (1) Ganesh, M.; Namboothiri, I. N. N. Stereospecific approach to  $\alpha,\beta$ -disubstituted nitroalkenes via coupling of  $\alpha$ -bromonitroalkenes with boronic acids and terminal acetylenes. *Tetrahedron* 2007, **63**, 11973-11983.
- (2) Bharathiraja, G; Sakthivel, S; Sengoden, M and Punniyamurthy, T. A Novel Tandem Sequence to Pyrrole Syntheses by 5-endo-digCyclization of 1,3-Enynes with Amines. *Org. Lett.*, 2013, **15**, 4996-4999.
- (3) Bharathiraja, G.; Sengoden, M.; Kannan, M.; Punniyamurthy, T. Expedient synthesis of tetrasubstituted pyrroles via a copper-catalyzed cascade inter-/intramolecular cyclization of 1,3-enynes carry a nitro group with amines. *Org. Biomol. Chem.*, 2015, **13**, 2786-2792.
- (4) Ge, J.; Ding, Q.; Wang, X.; Peng, Y. Three-Component Cascade Synthesis of Fully-substituted Trifluoromethyl Pyrroles via a Cu(II)/Rh(III)-promoted aza-Michael Addition/Trifluoromethylation Cyclization/Oxidation Reaction. *J. Org. Chem.* 2020, **85**, 7658-7665.

## 4. NMR Spectra for Compounds 4 and 5

217-9-66-1

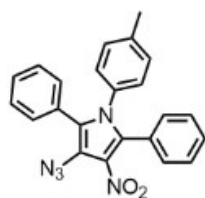

4a

$^1\text{H}$  NMR (400 MHz,  $\text{CDCl}_3$ )

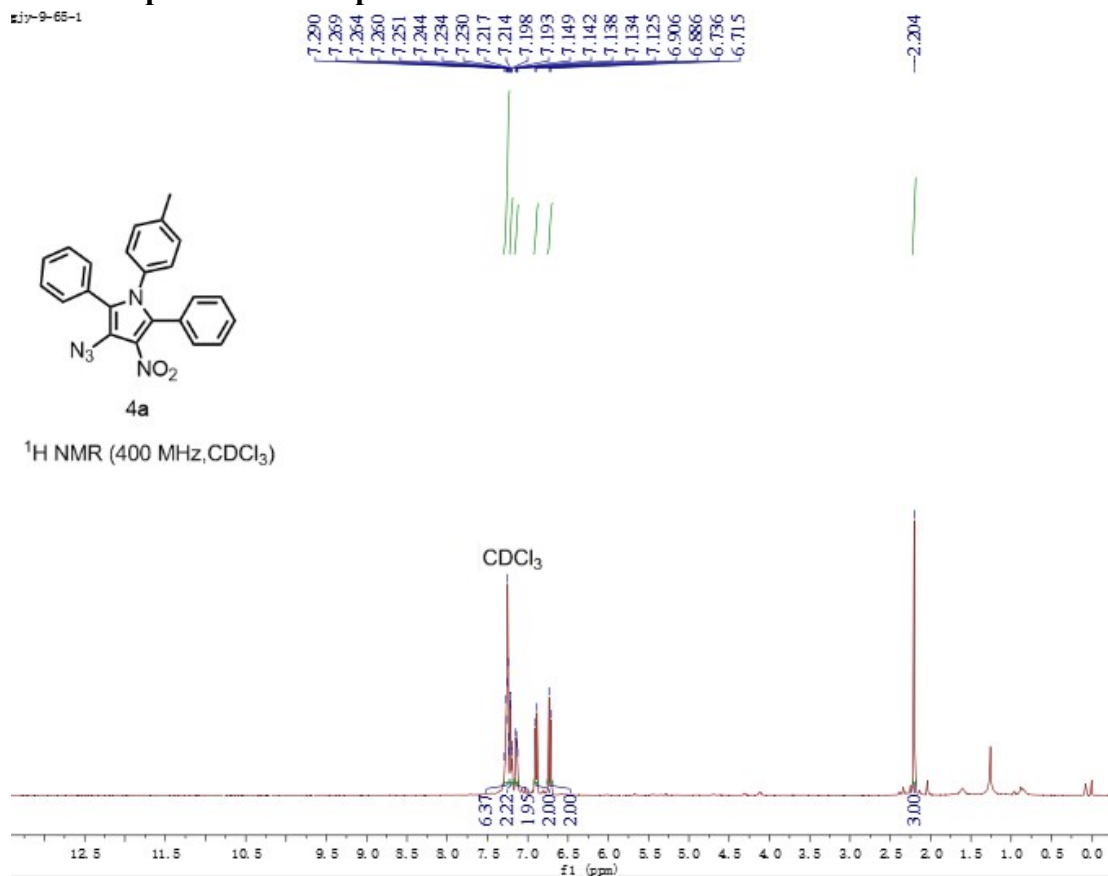

217-9-66-1

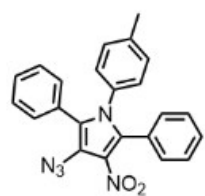

4a

$^{13}\text{C}$  NMR (100 MHz,  $\text{CDCl}_3$ )

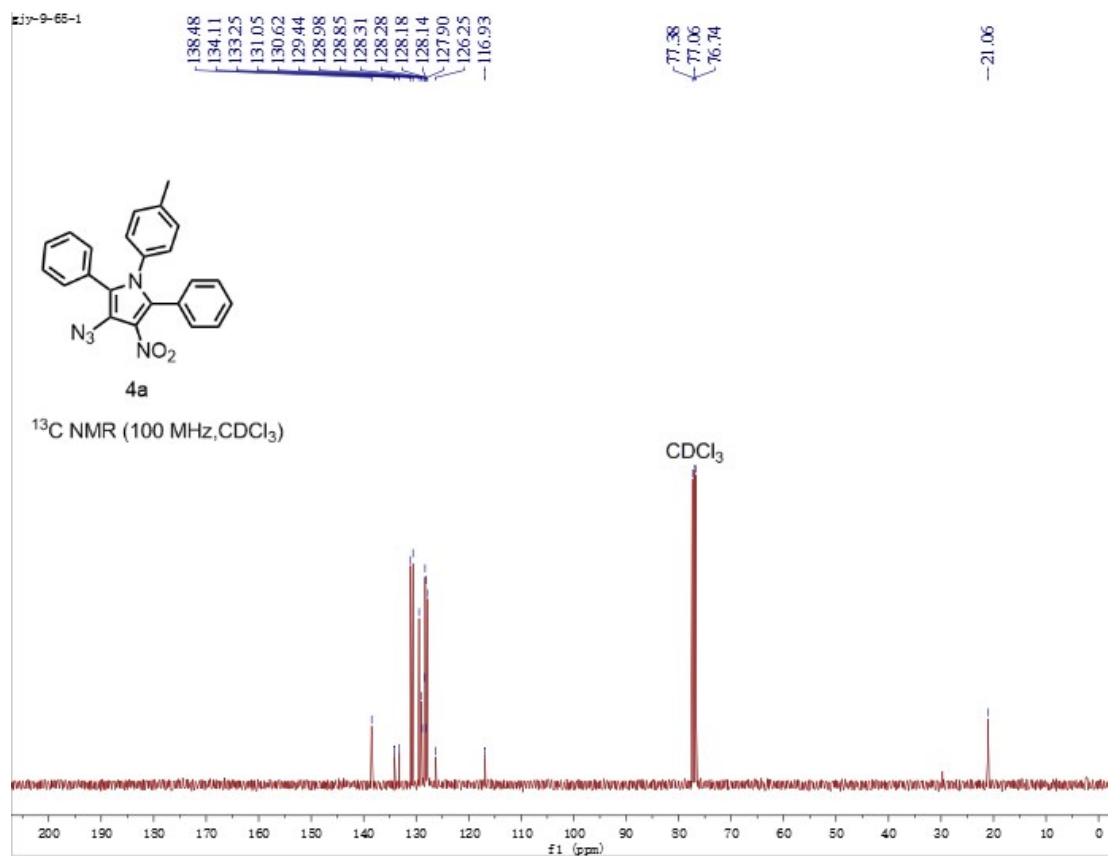

zjy-6-21-1

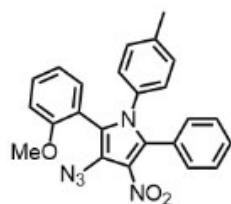

4b

$^1\text{H NMR}$  (400 MHz,  $\text{CDCl}_3$ )

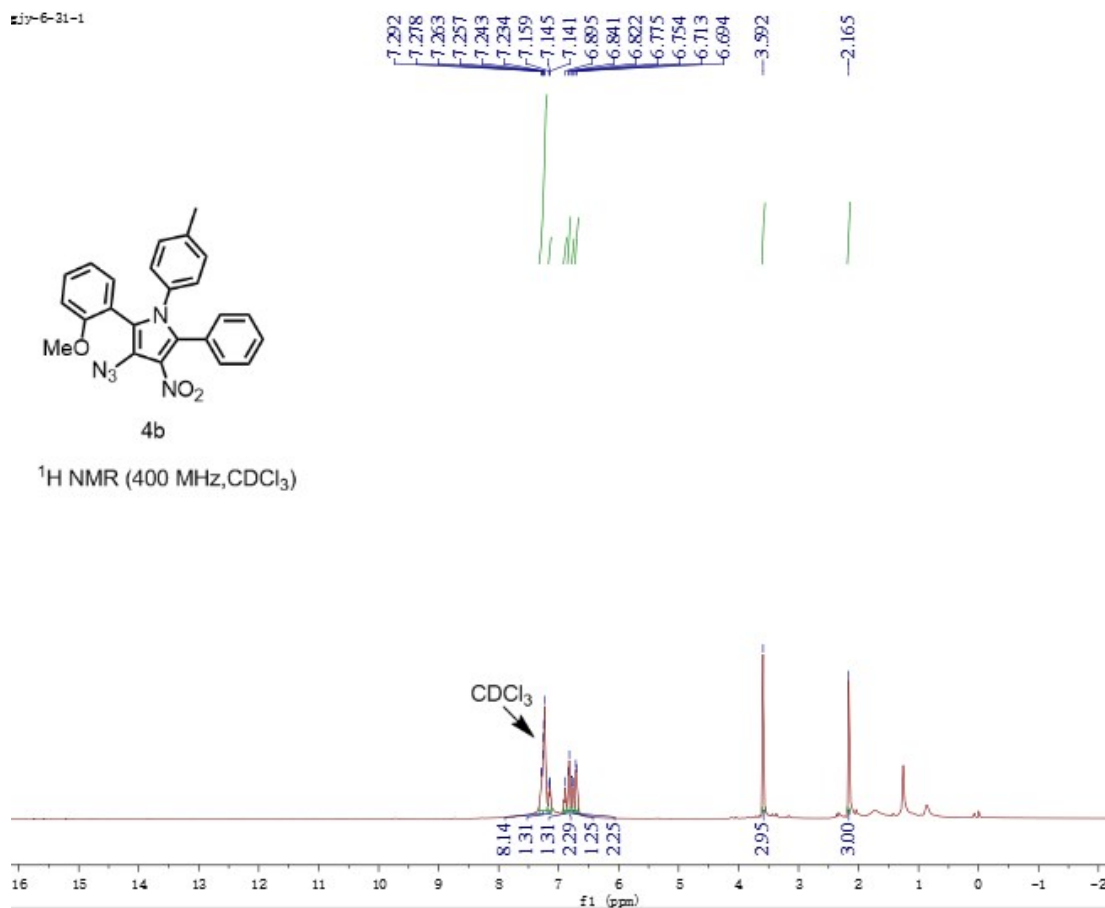

zjy-6-21-1

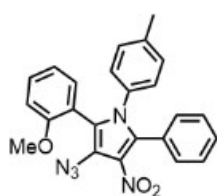

4b

$^{13}\text{C NMR}$  (100 MHz,  $\text{CDCl}_3$ )

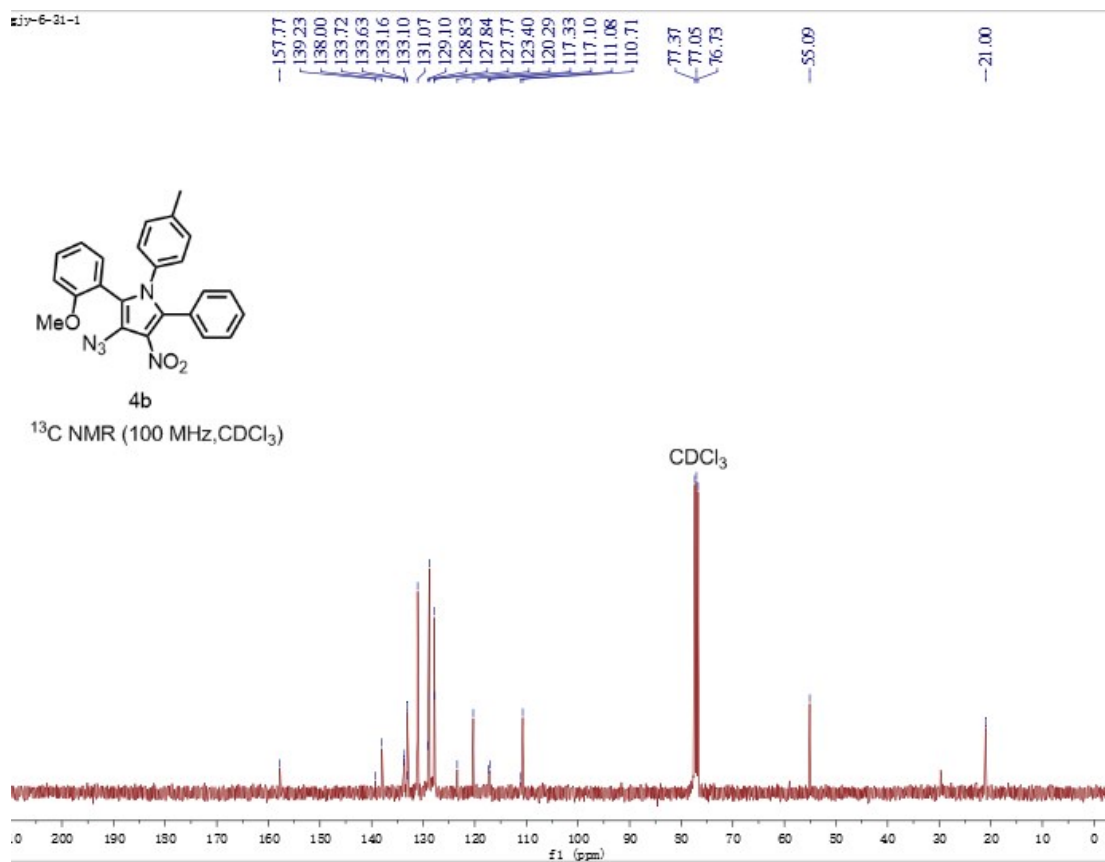

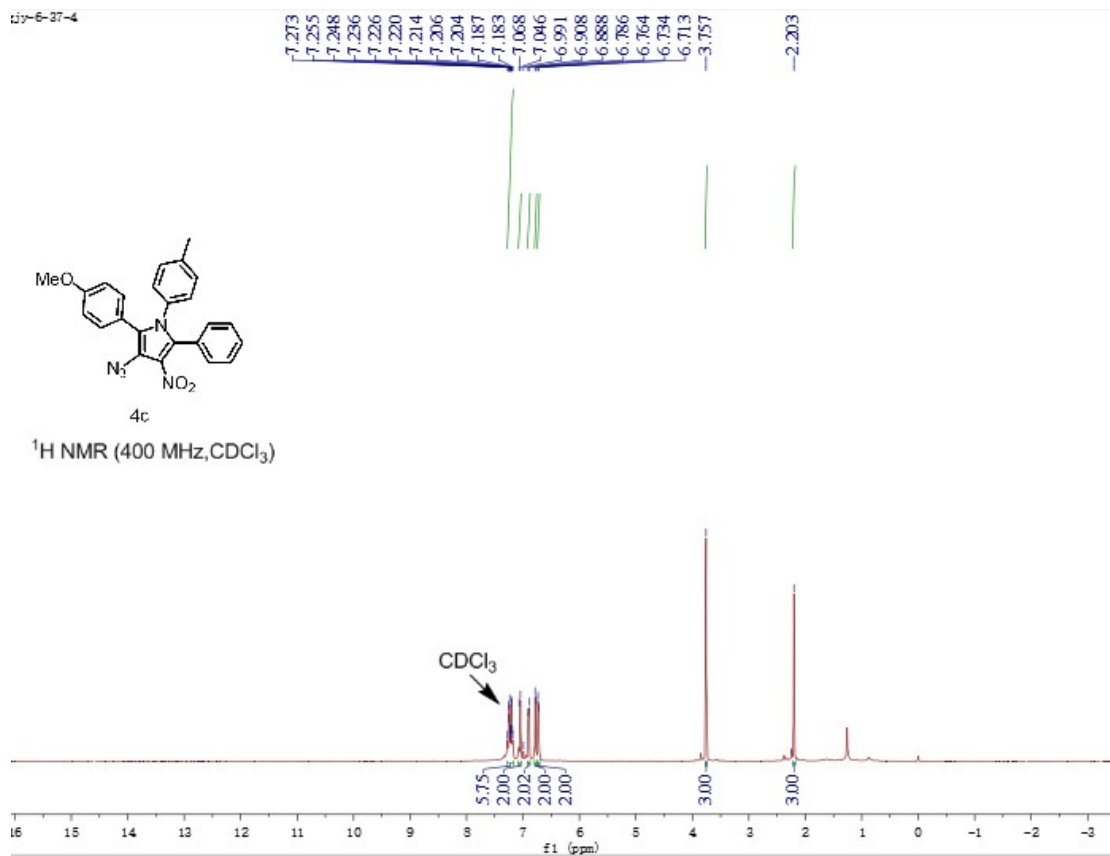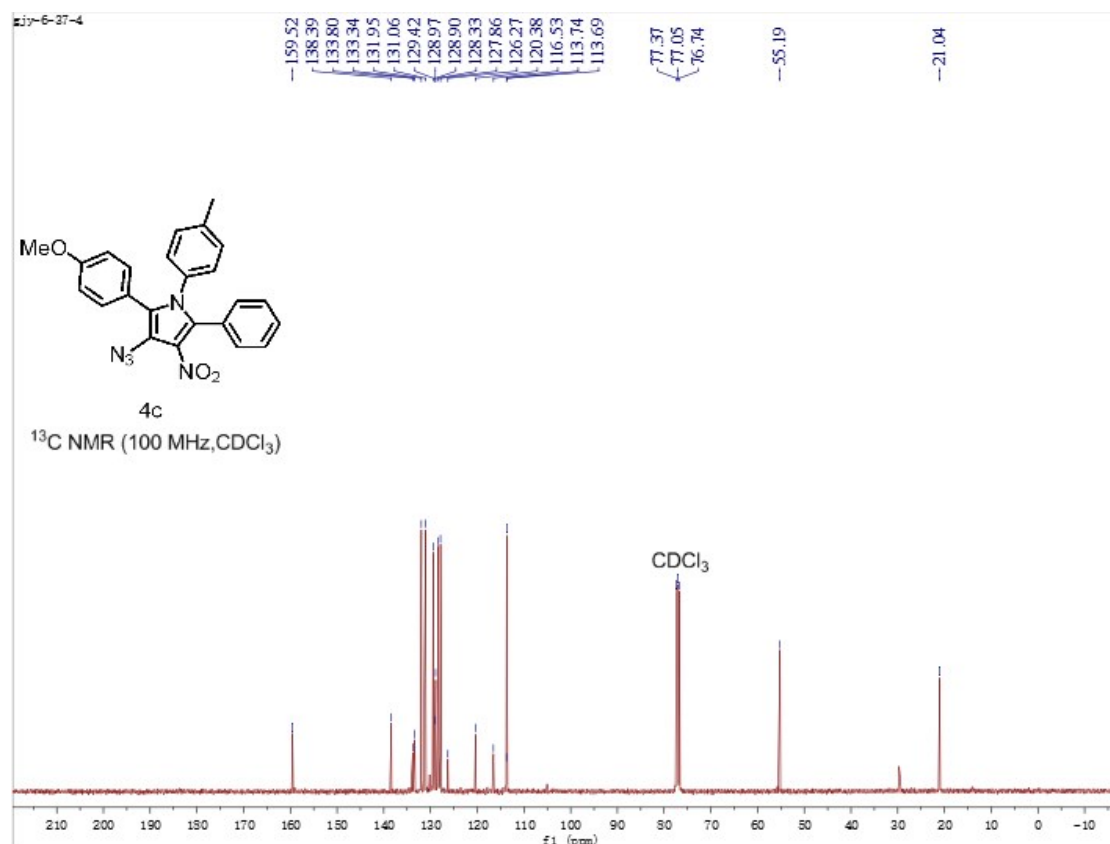



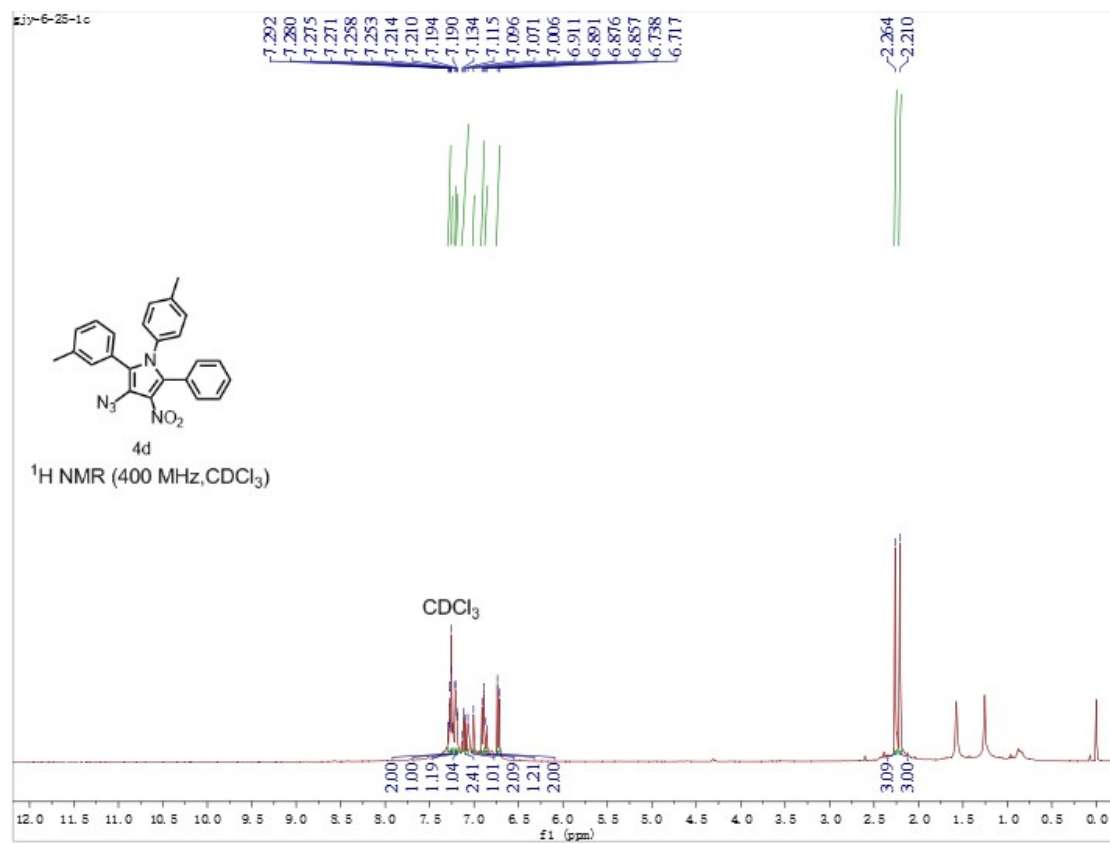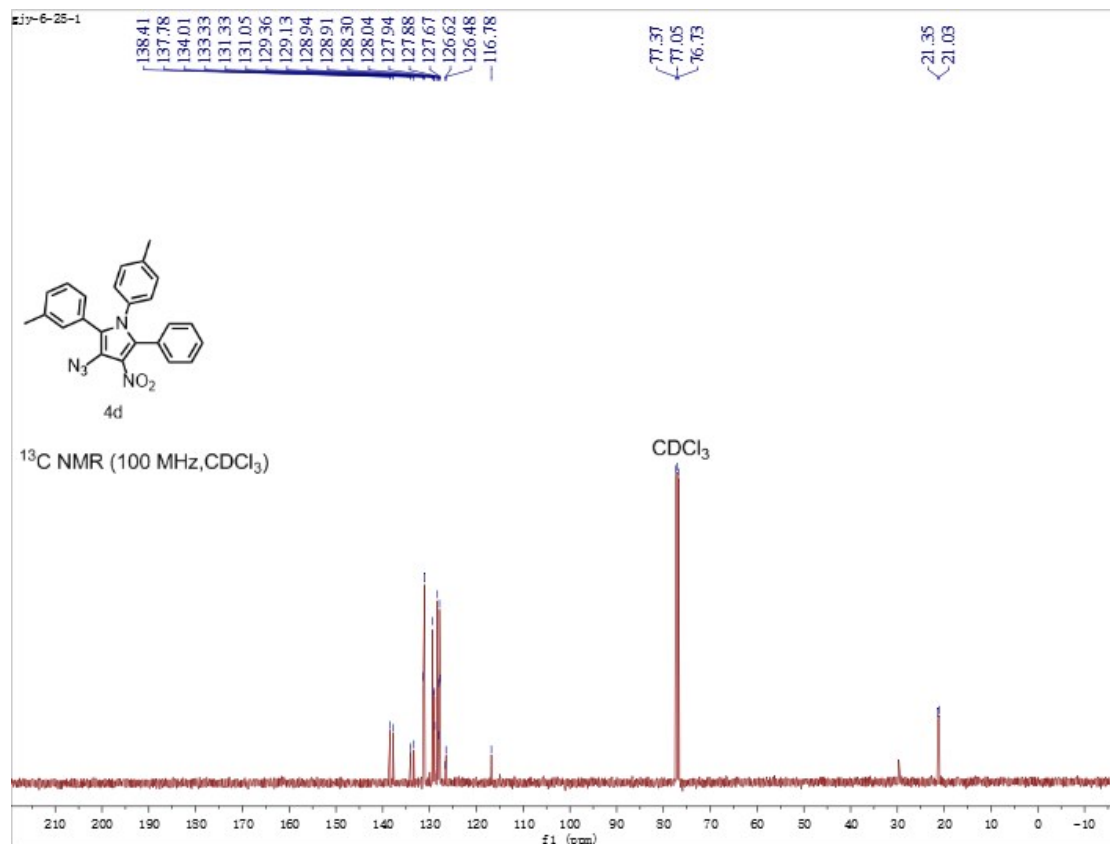

ujy-6-27-2

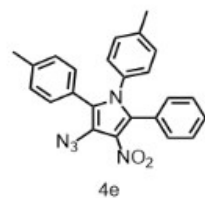

$^1\text{H NMR}$  (400 MHz,  $\text{CDCl}_3$ )

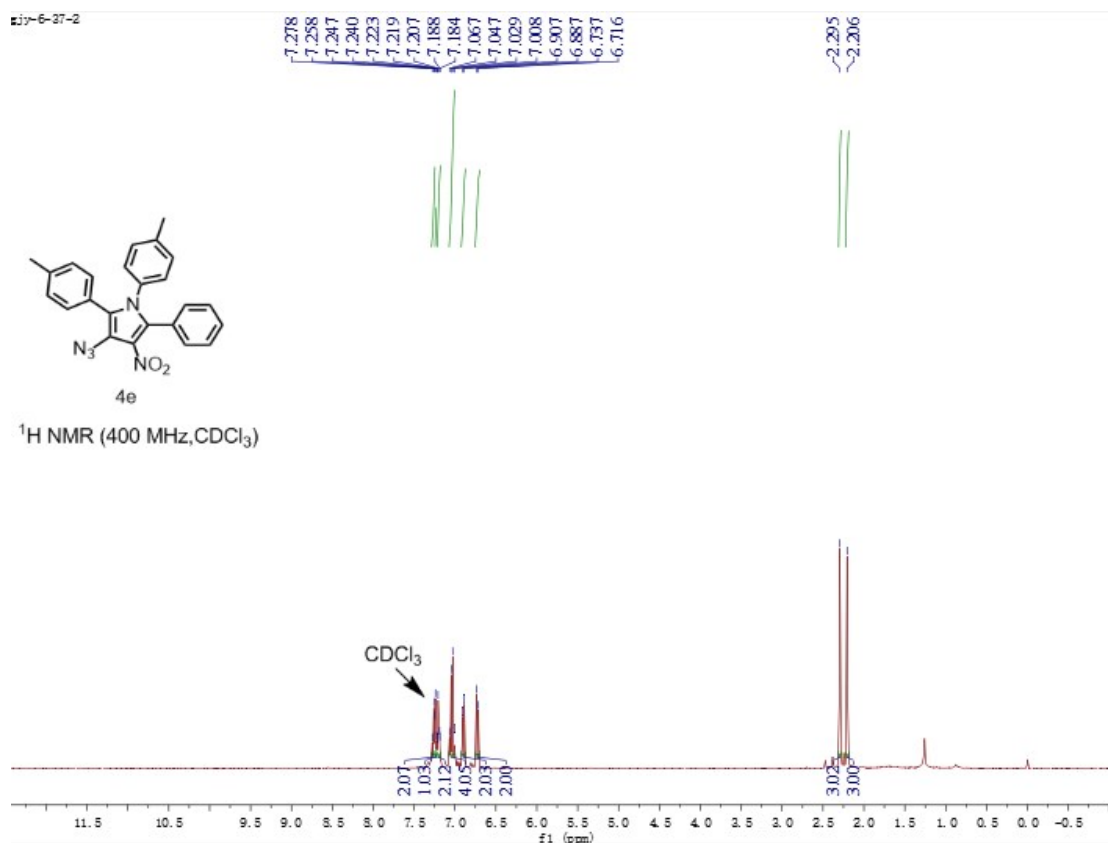

ujy-6-27-2

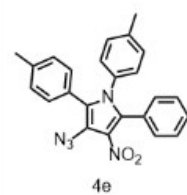

$^{13}\text{C NMR}$  (100 MHz,  $\text{CDCl}_3$ )

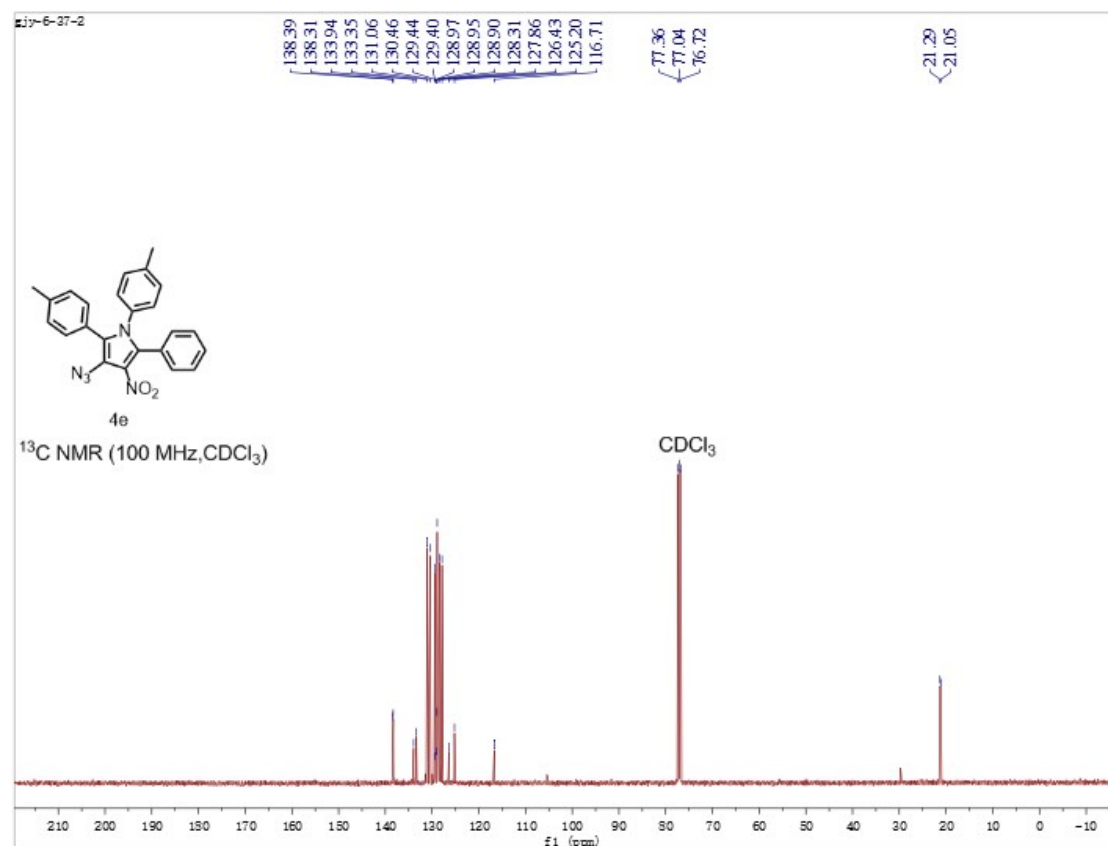

uj-6-66-3

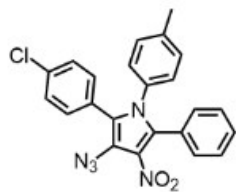

4f

$^1\text{H}$  NMR (400 MHz,  $\text{CDCl}_3$ )

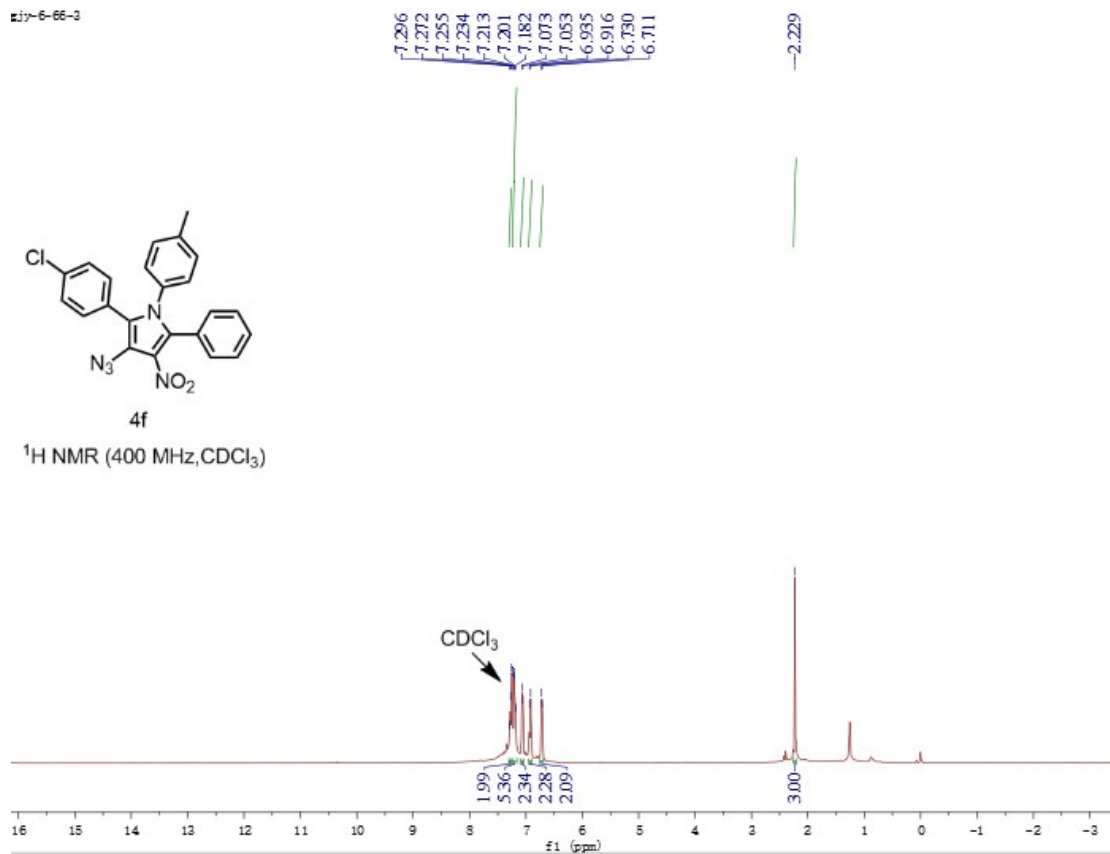

uj-6-66-3

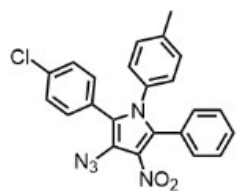

4f

$^{13}\text{C}$  NMR (100 MHz,  $\text{CDCl}_3$ )

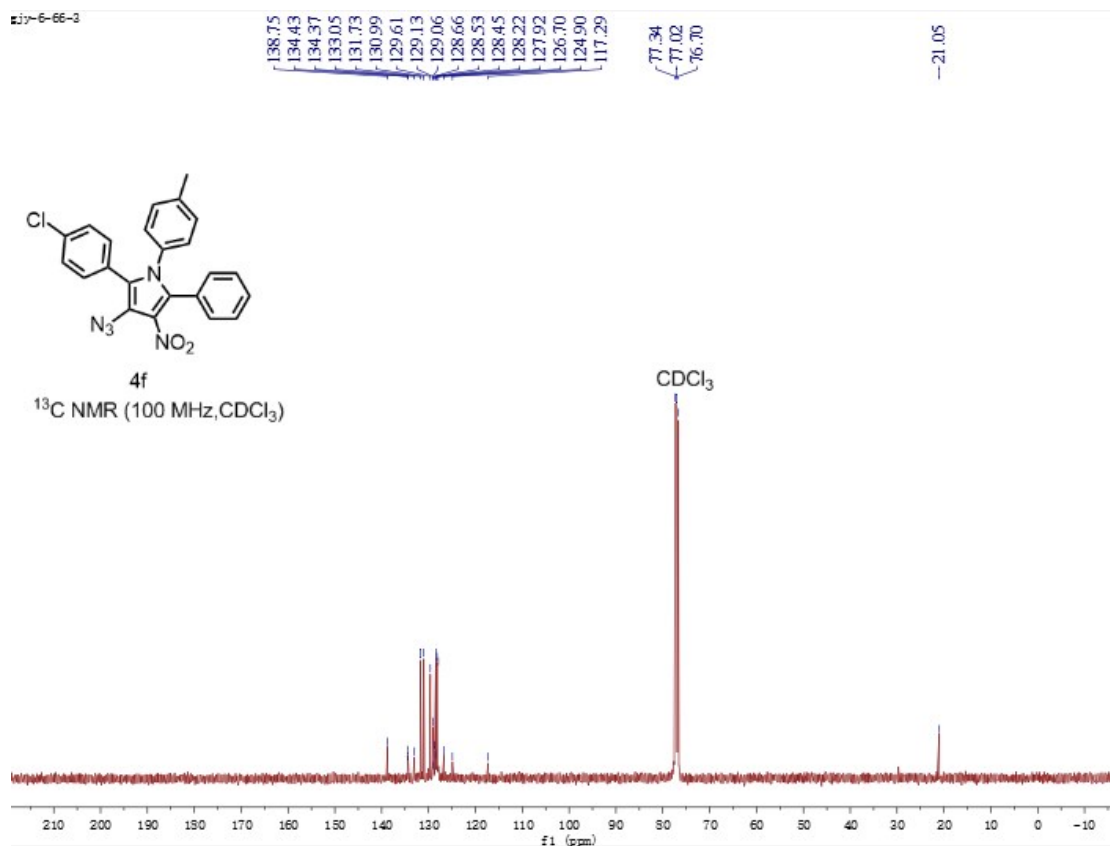

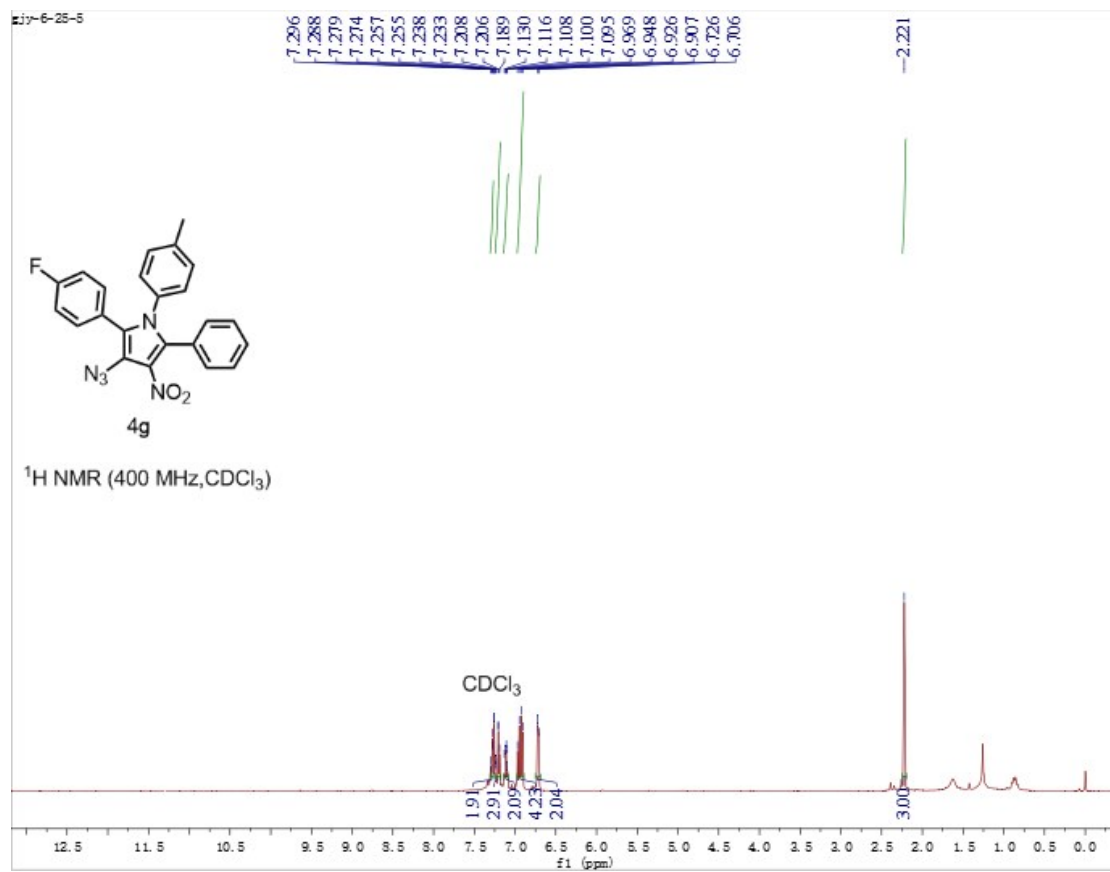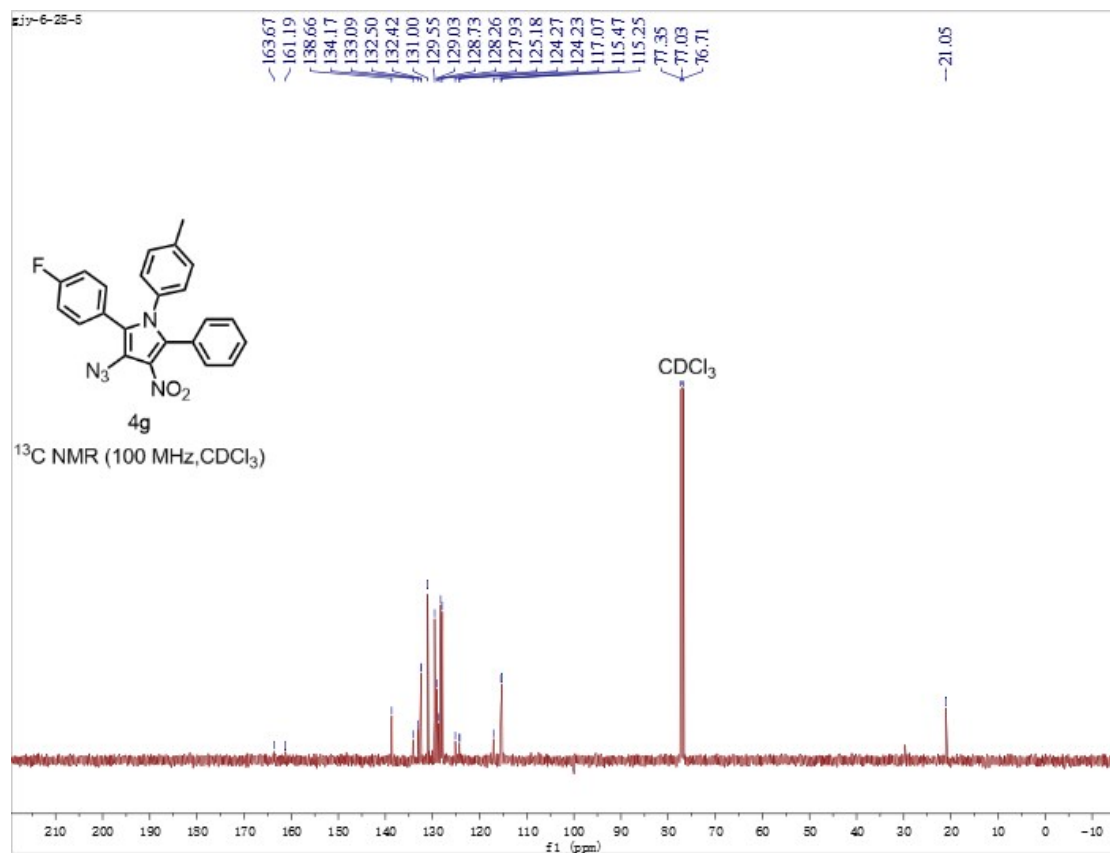

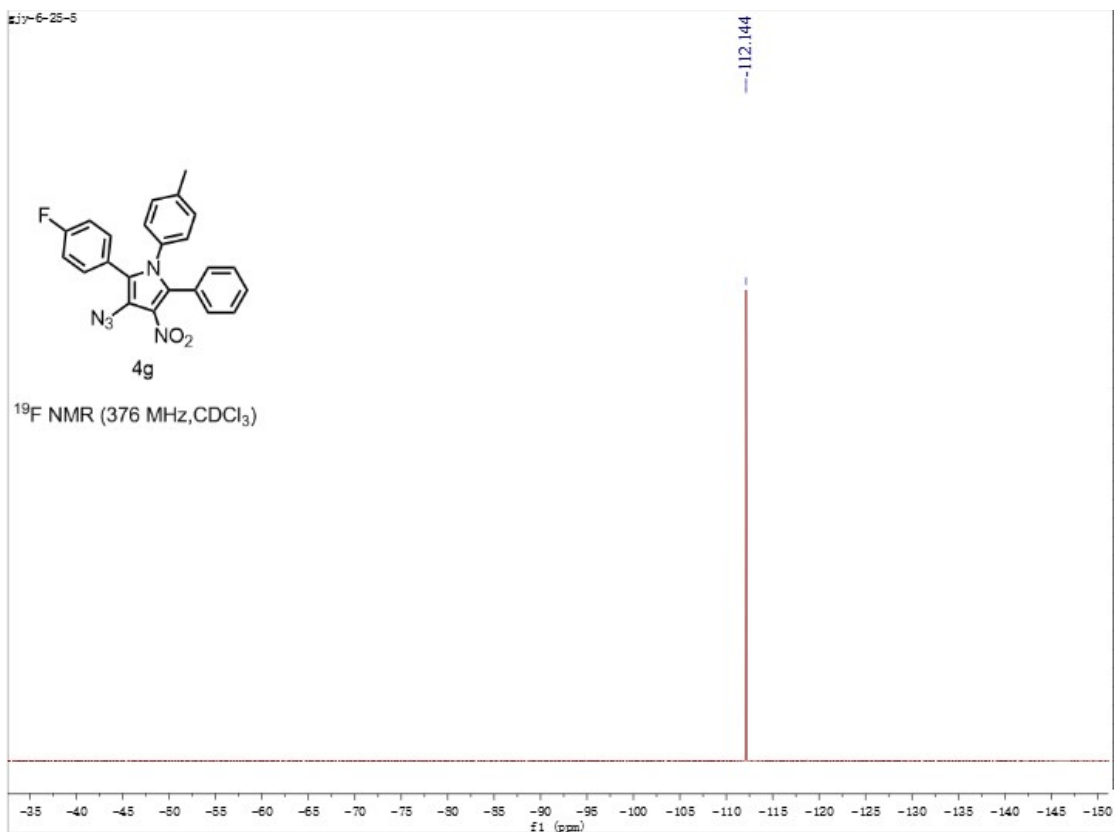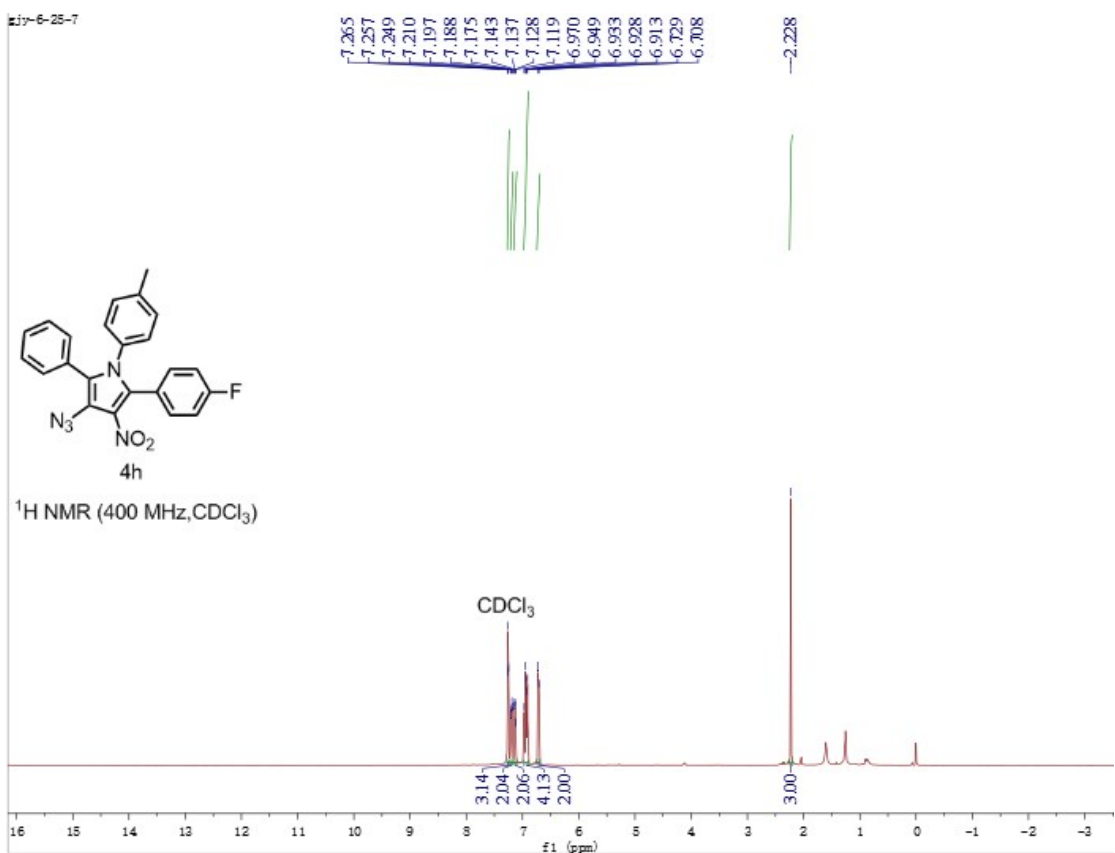

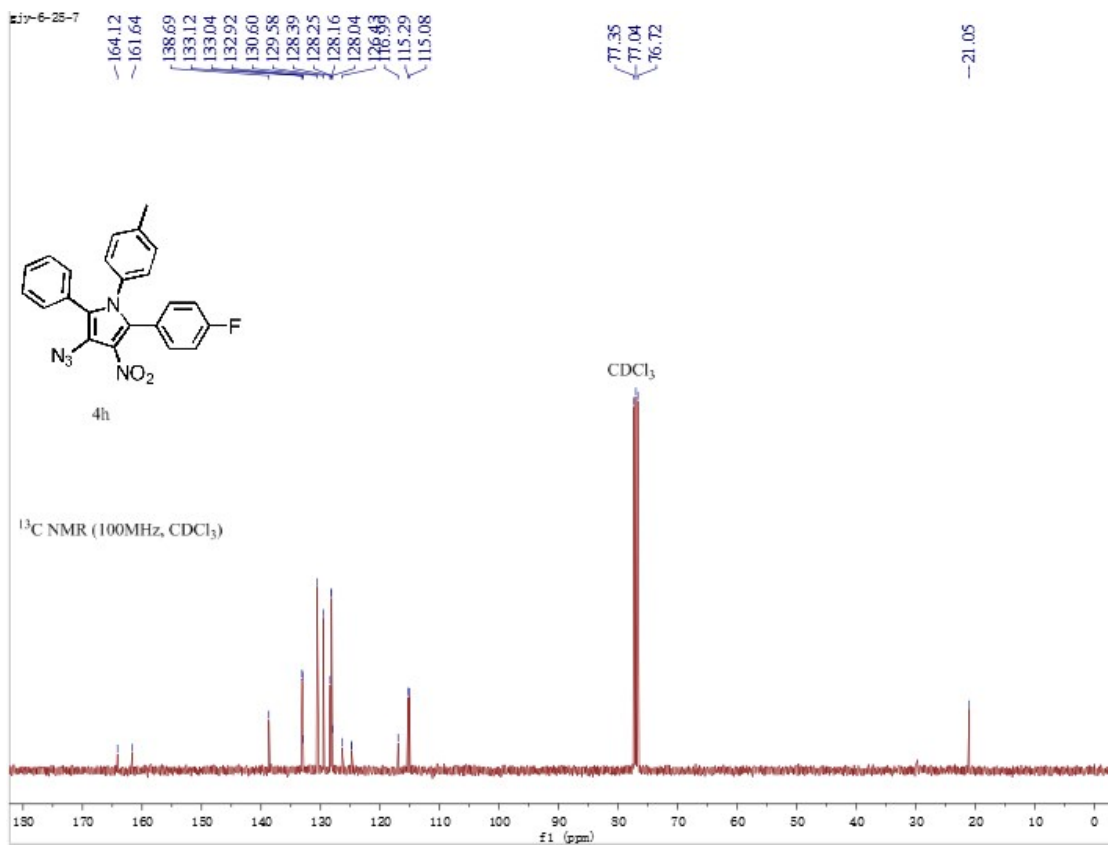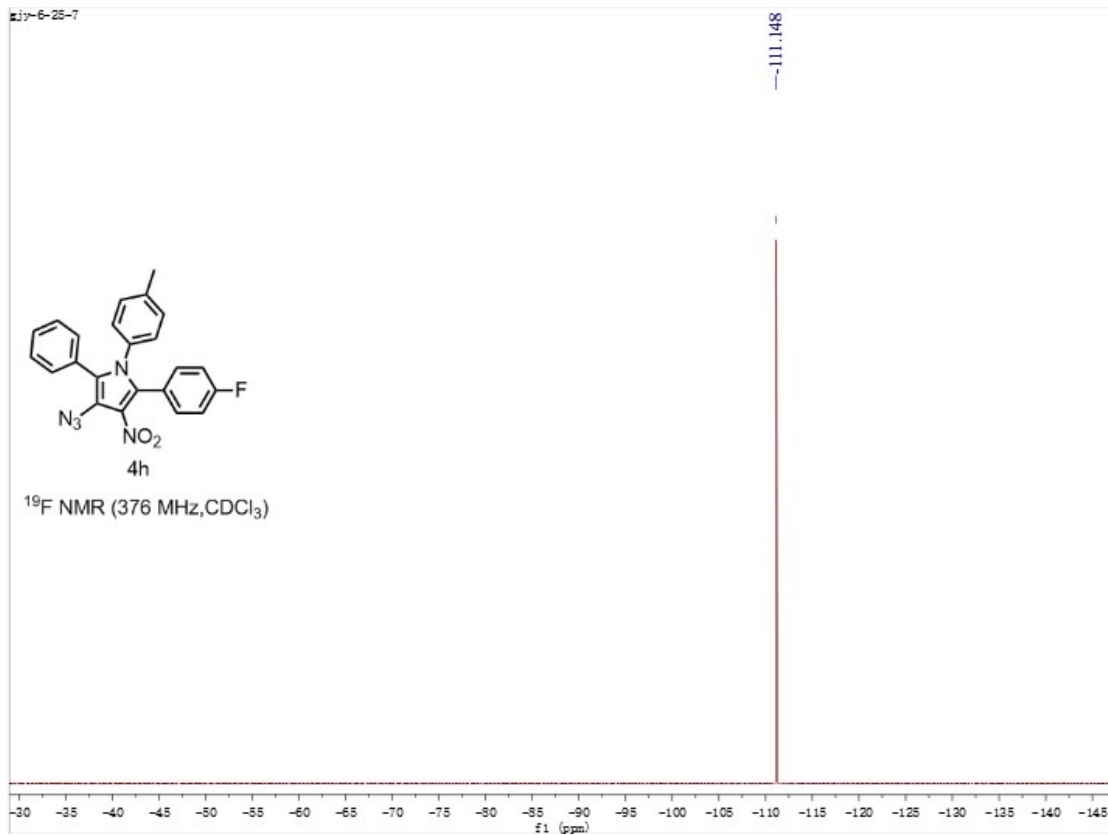

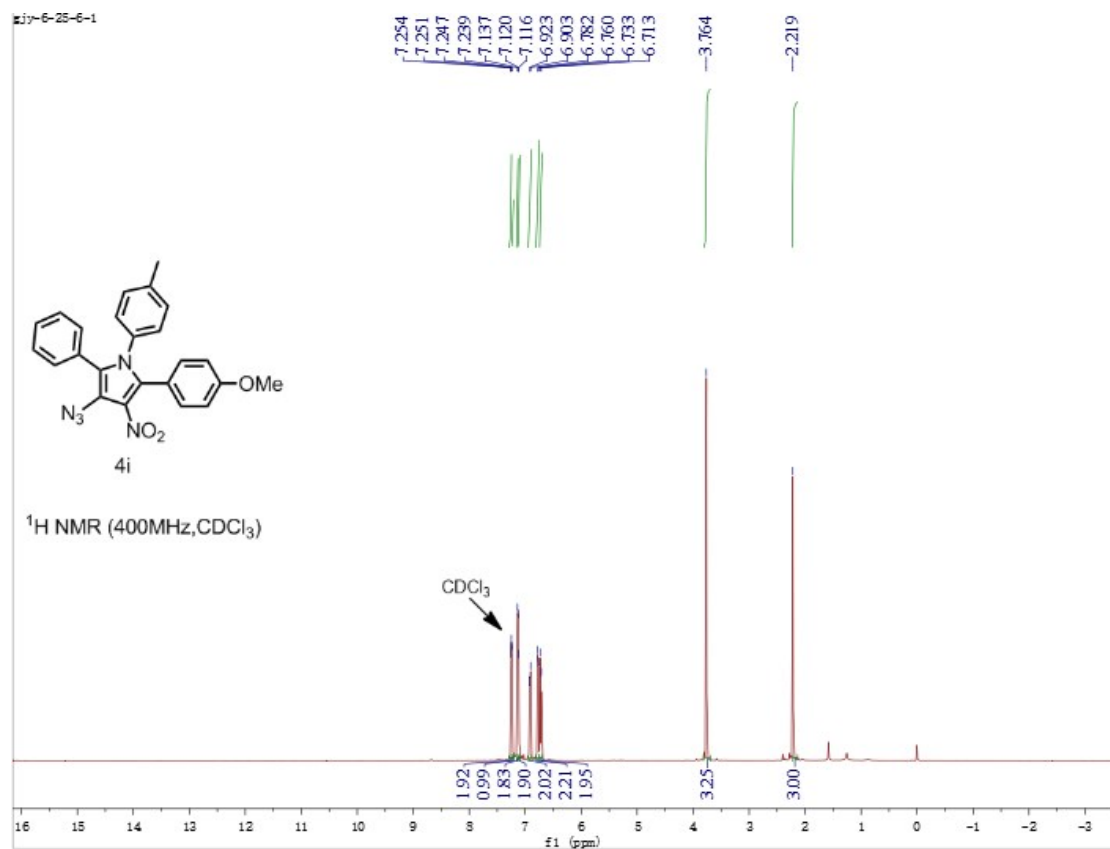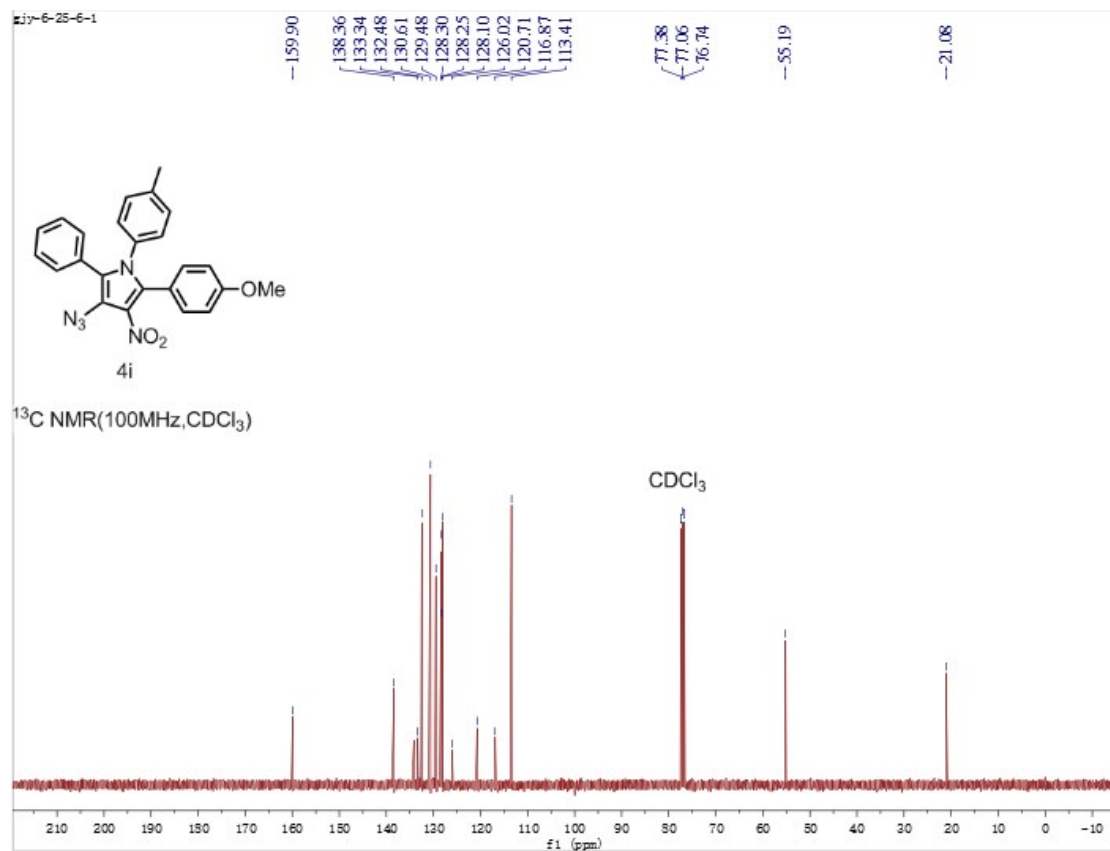

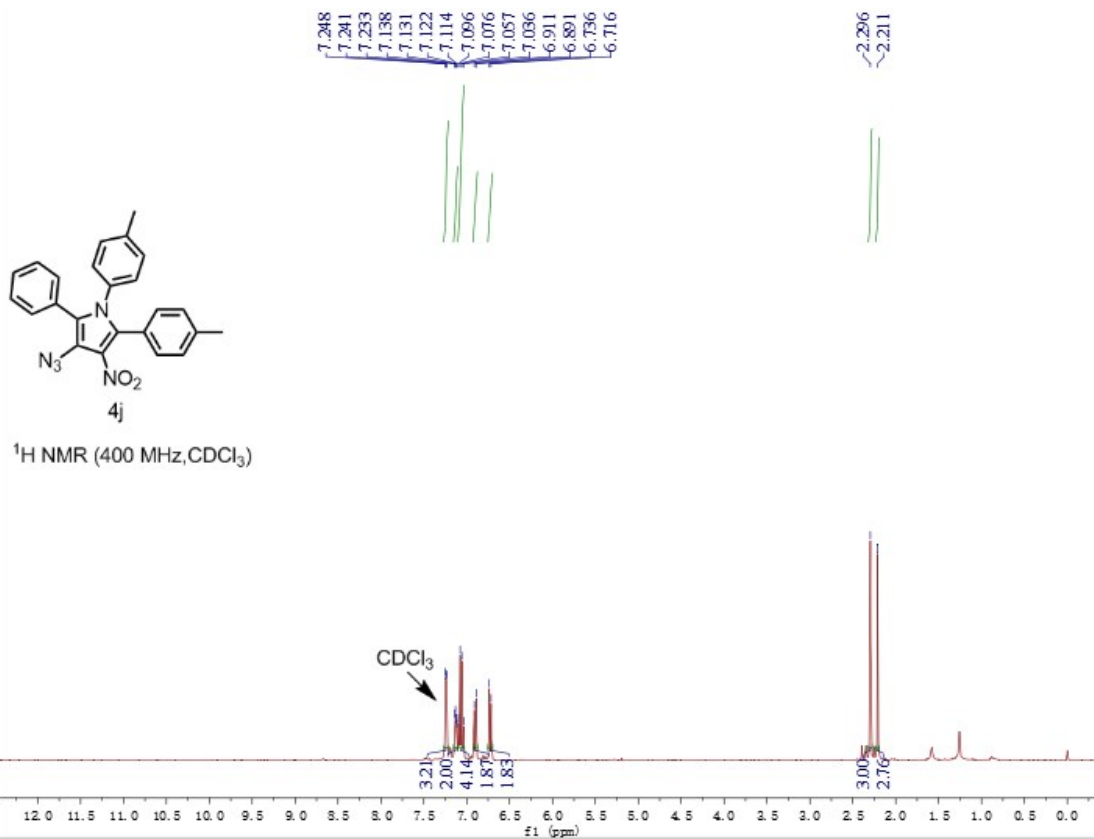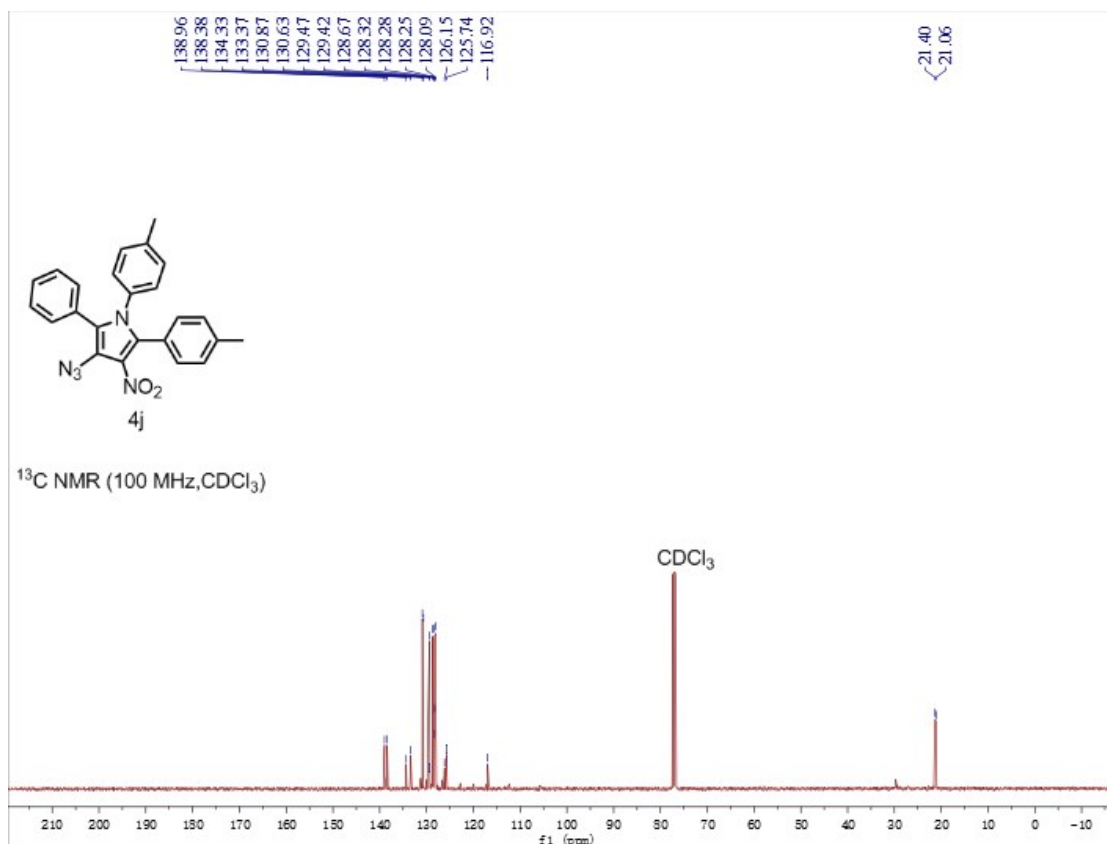



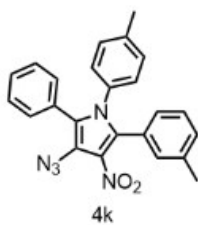

<sup>1</sup>H NMR (400MHz, CDCl<sub>3</sub>)

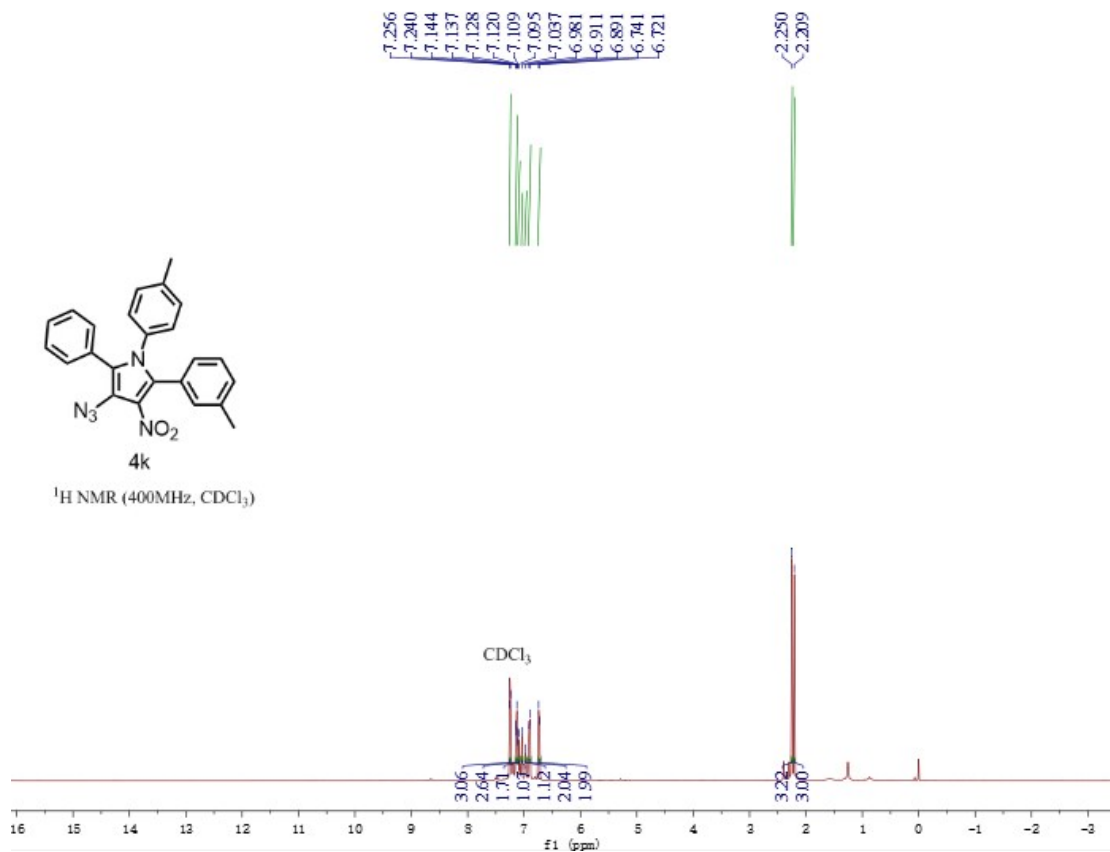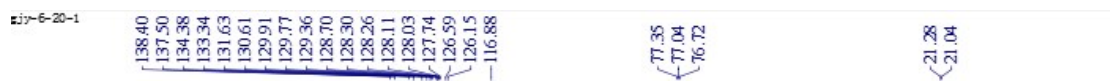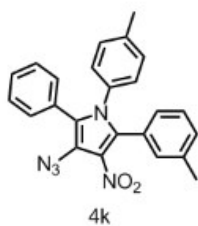

<sup>13</sup>C NMR (100 MHz, CDCl<sub>3</sub>)

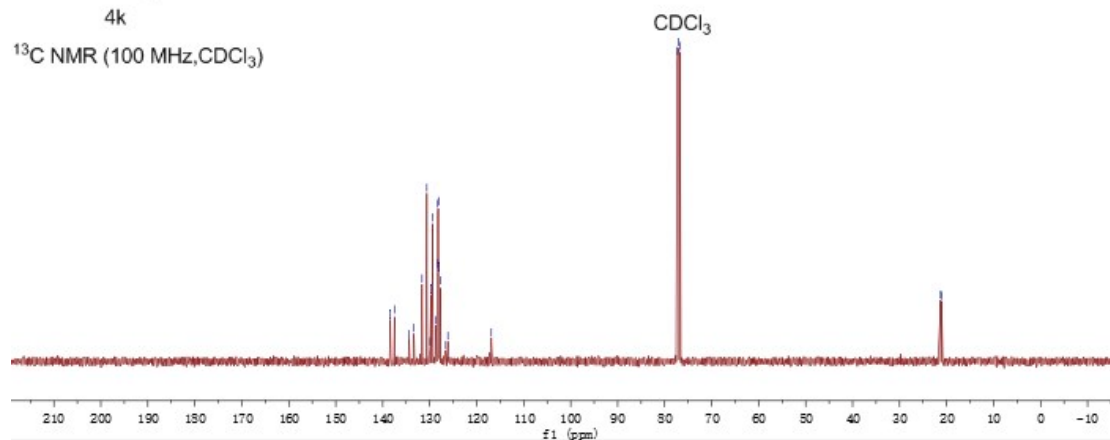

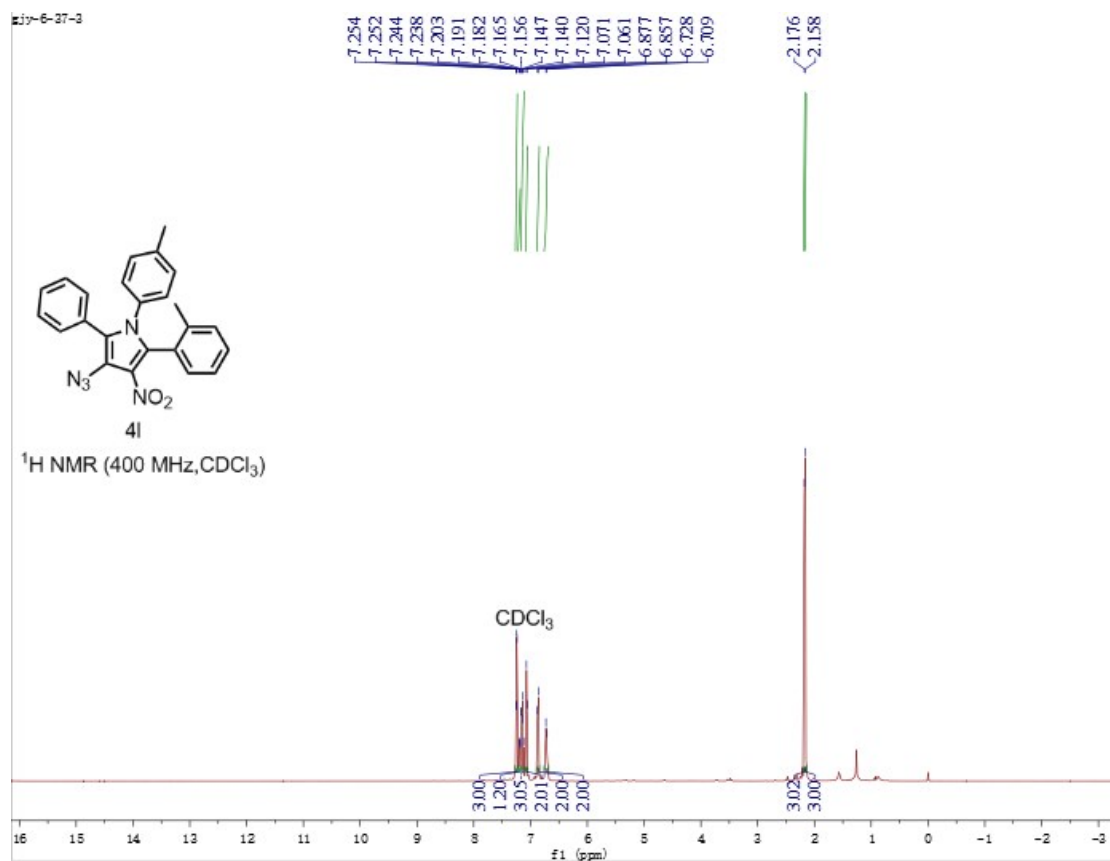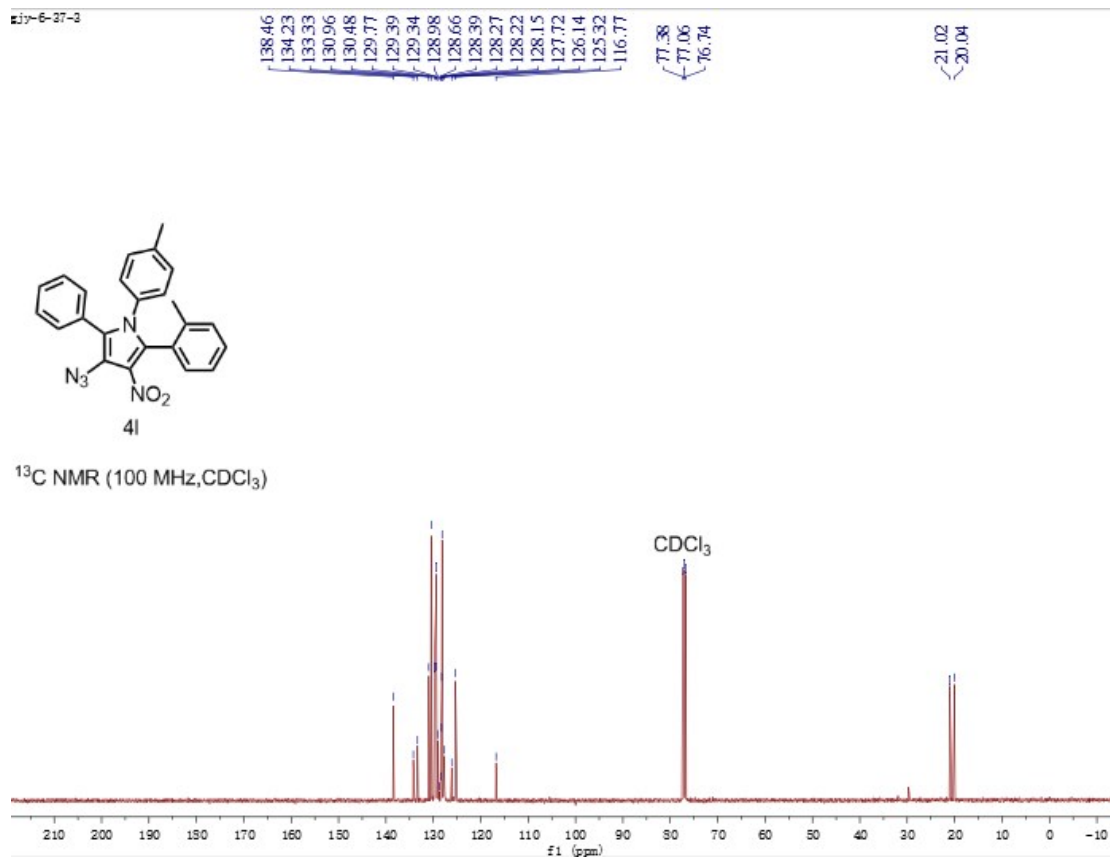

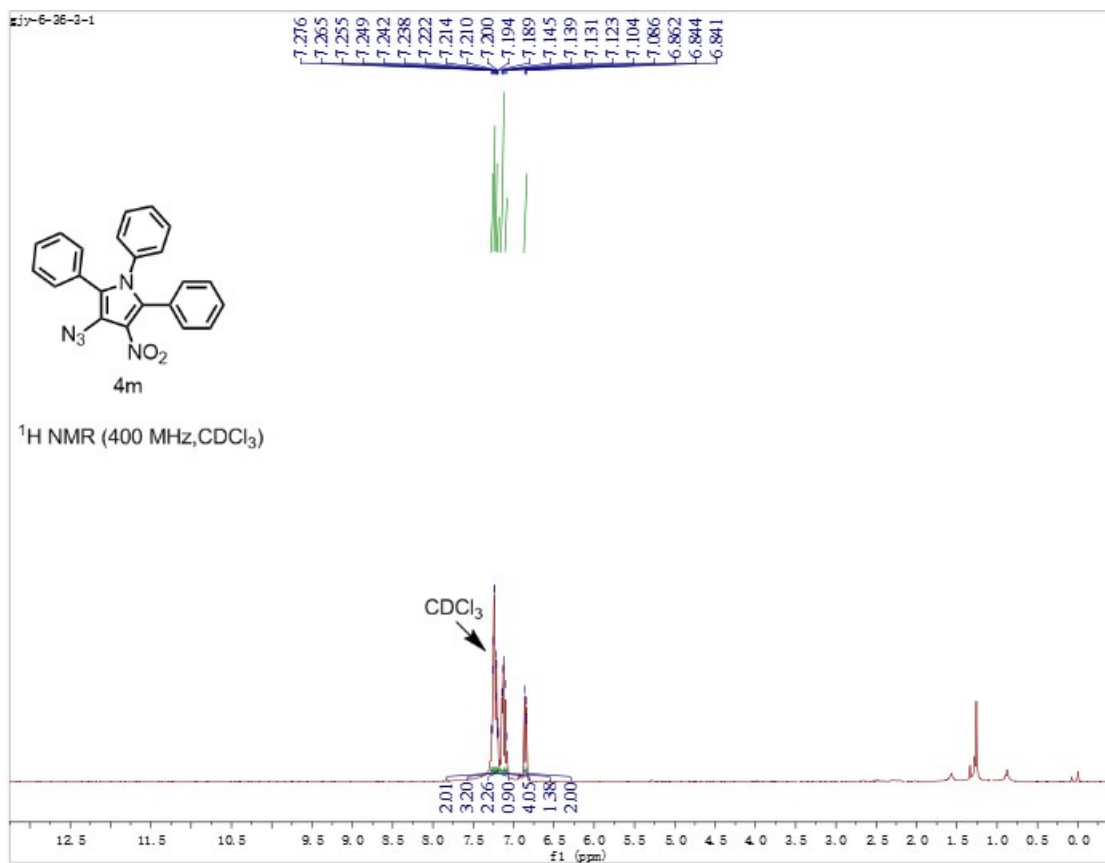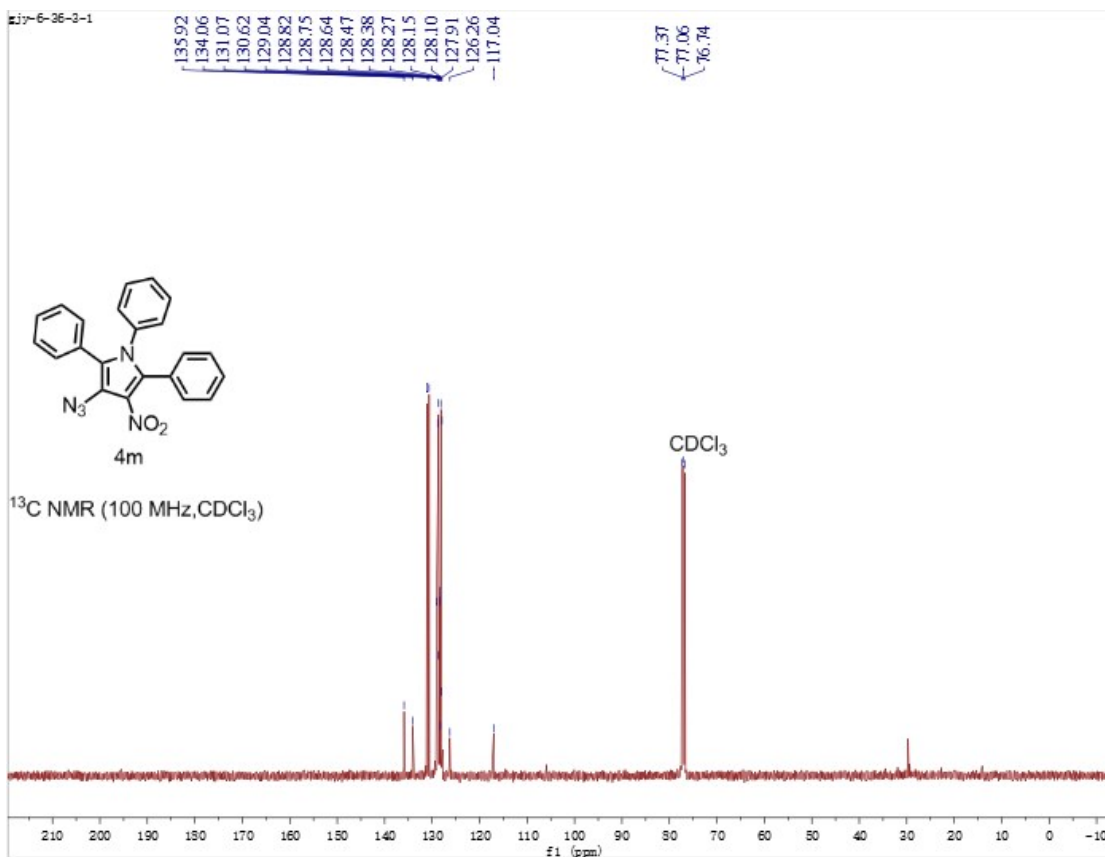

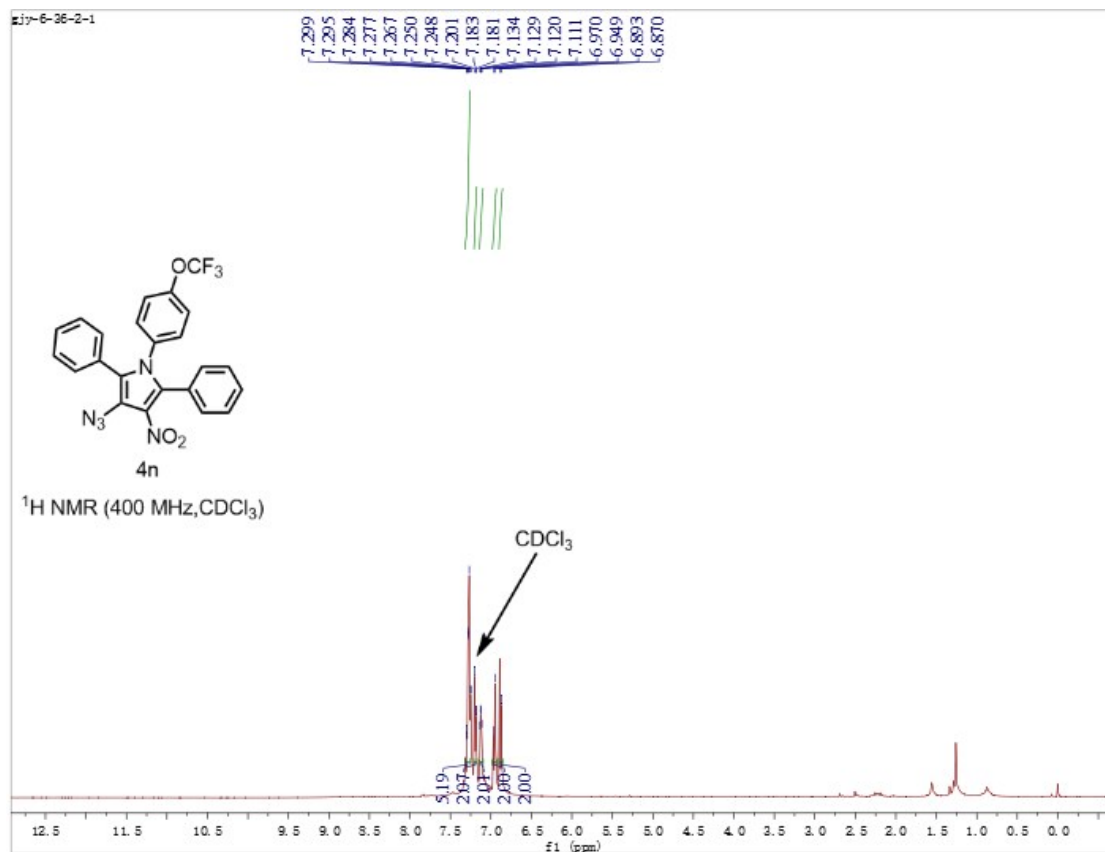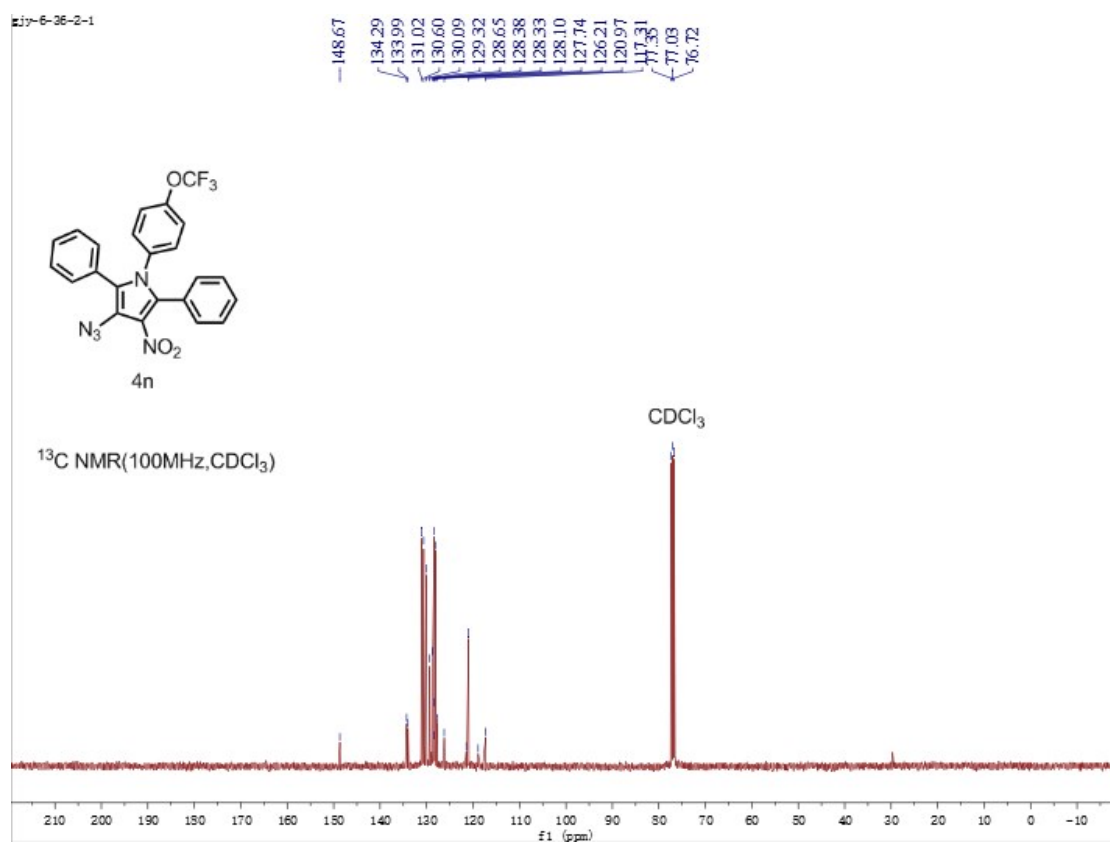

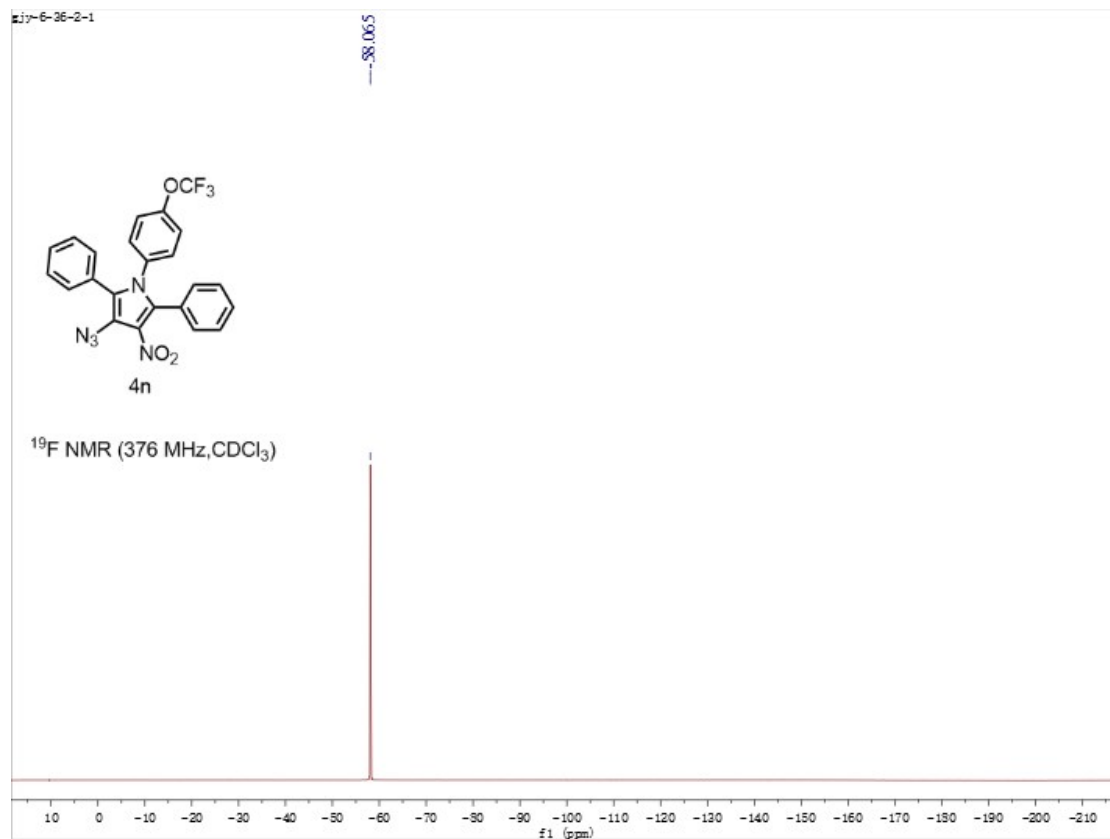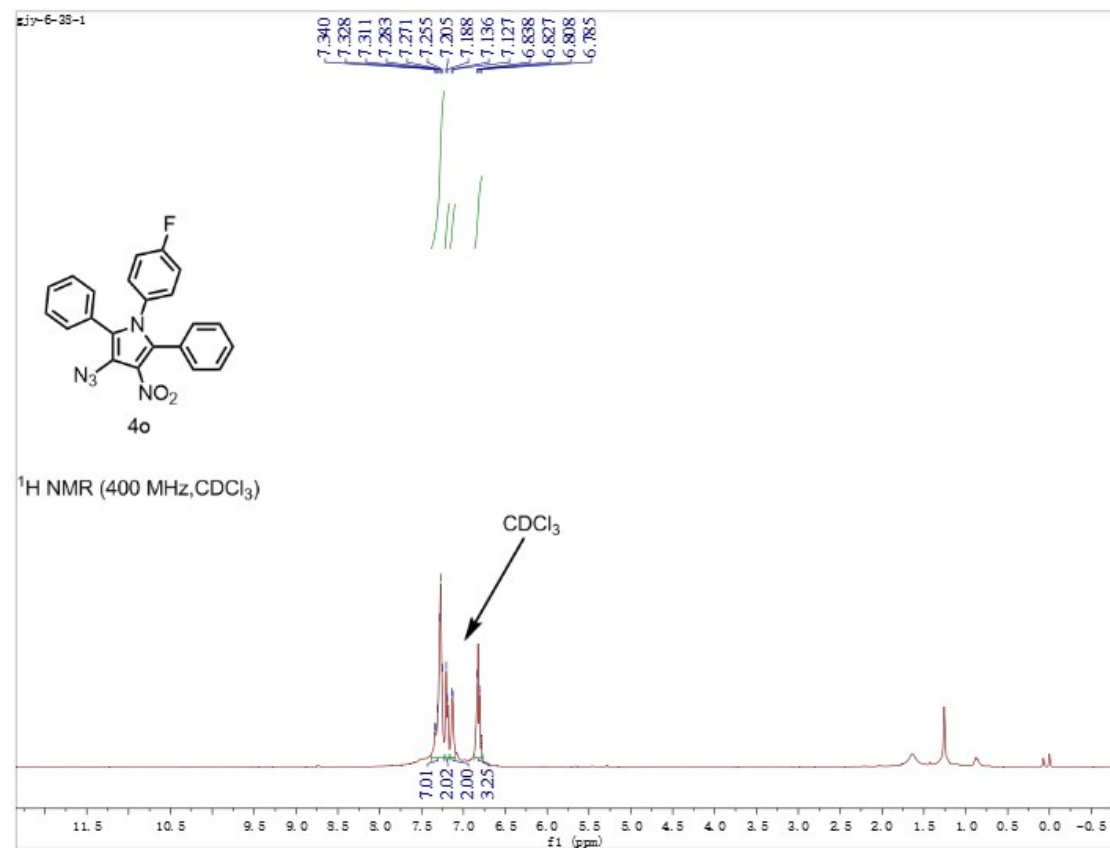

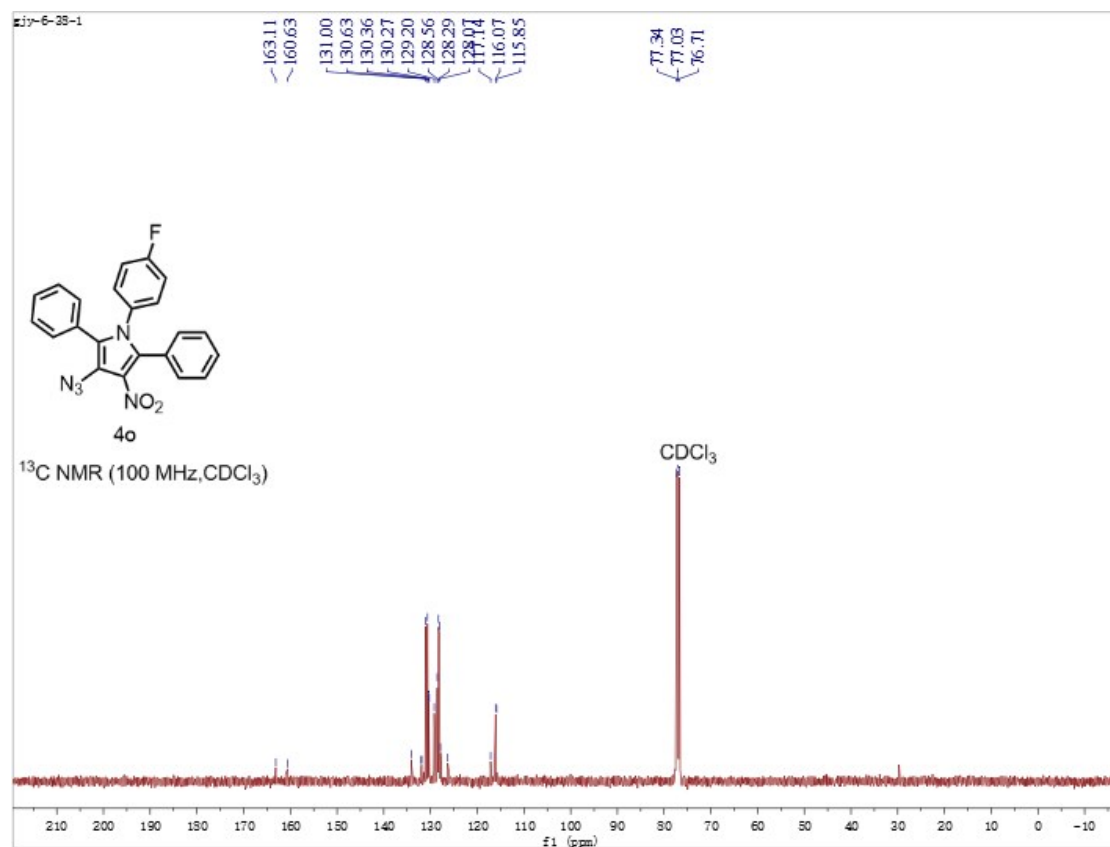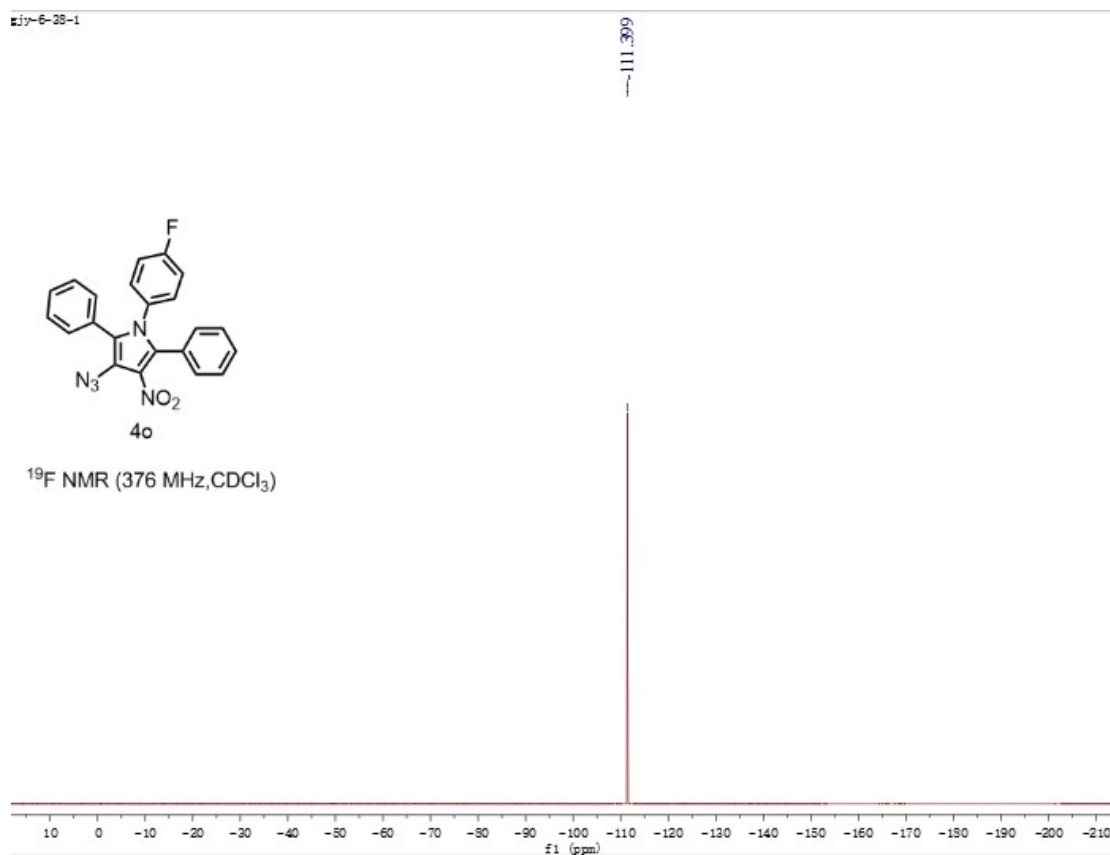

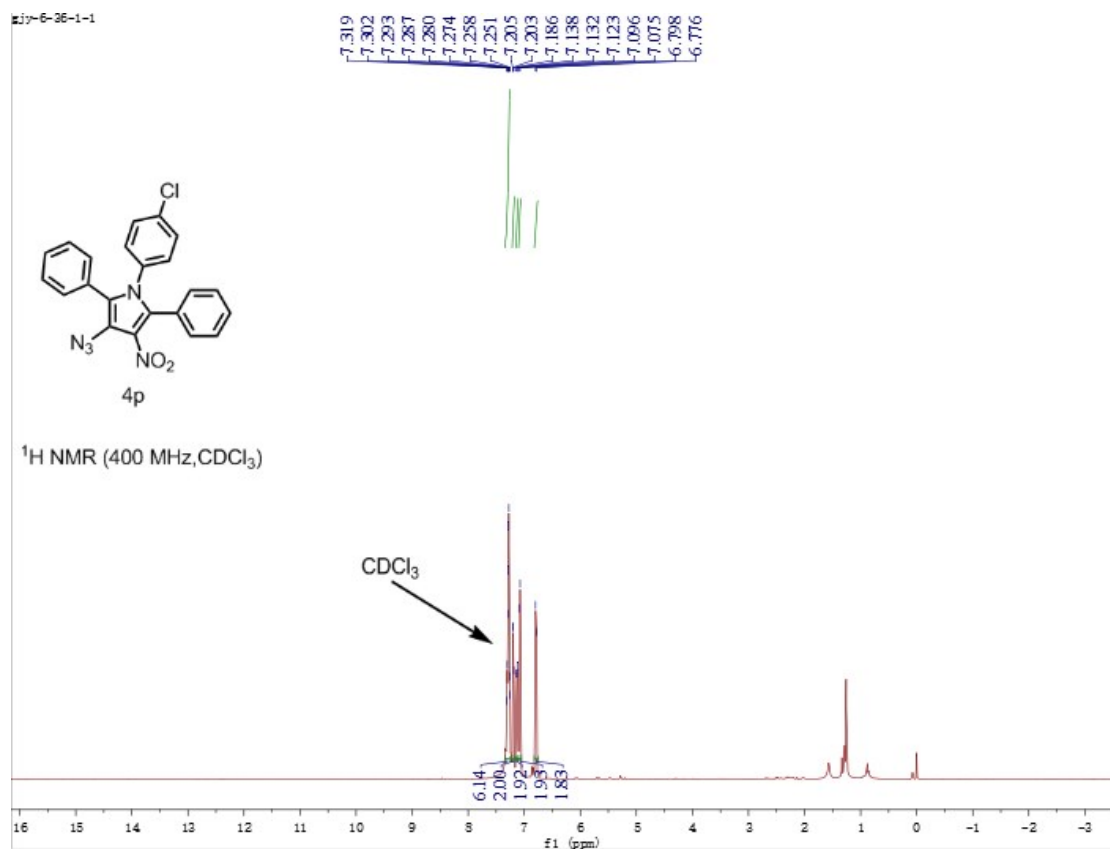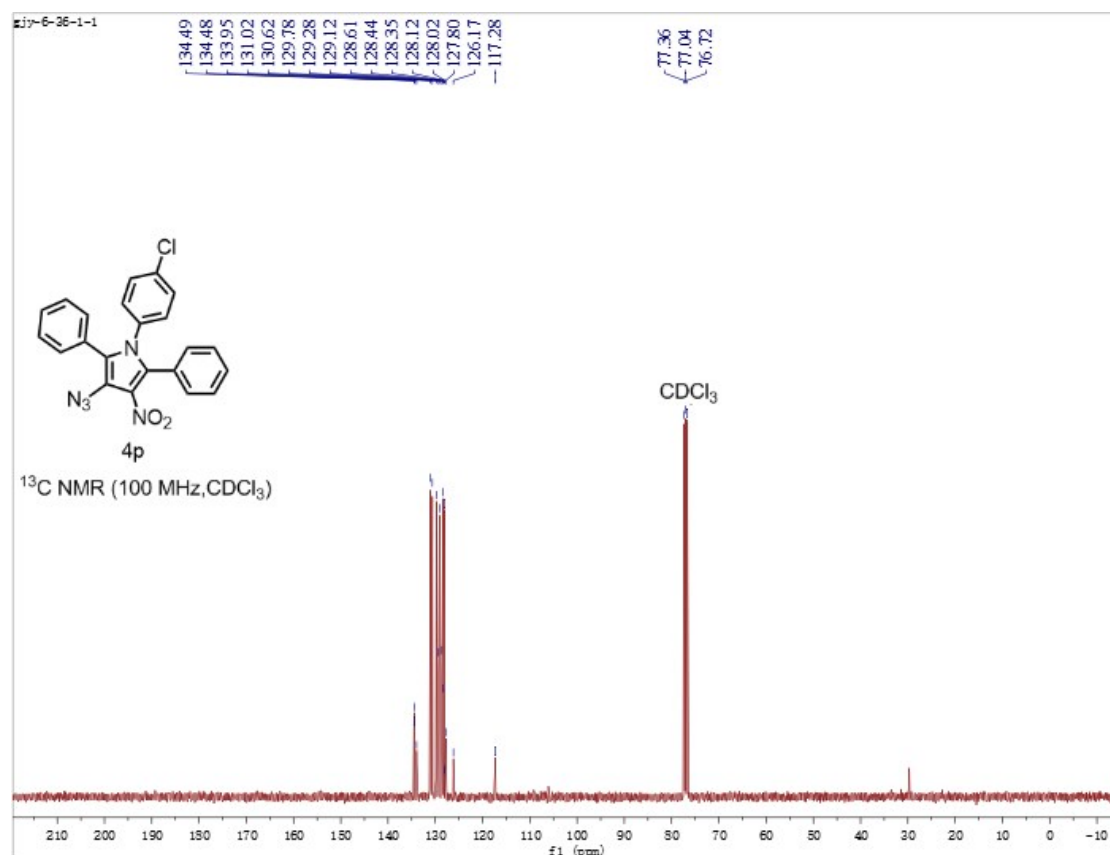

zj-6-24-2

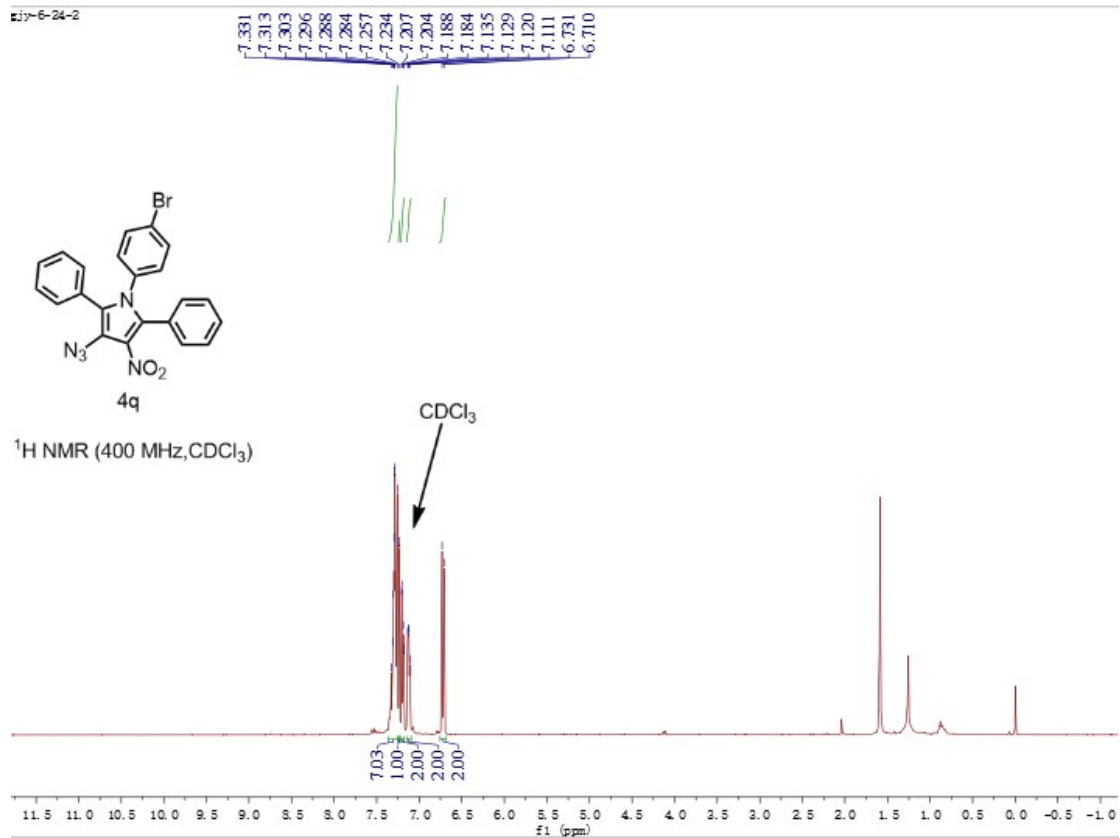

zj-6-24-2

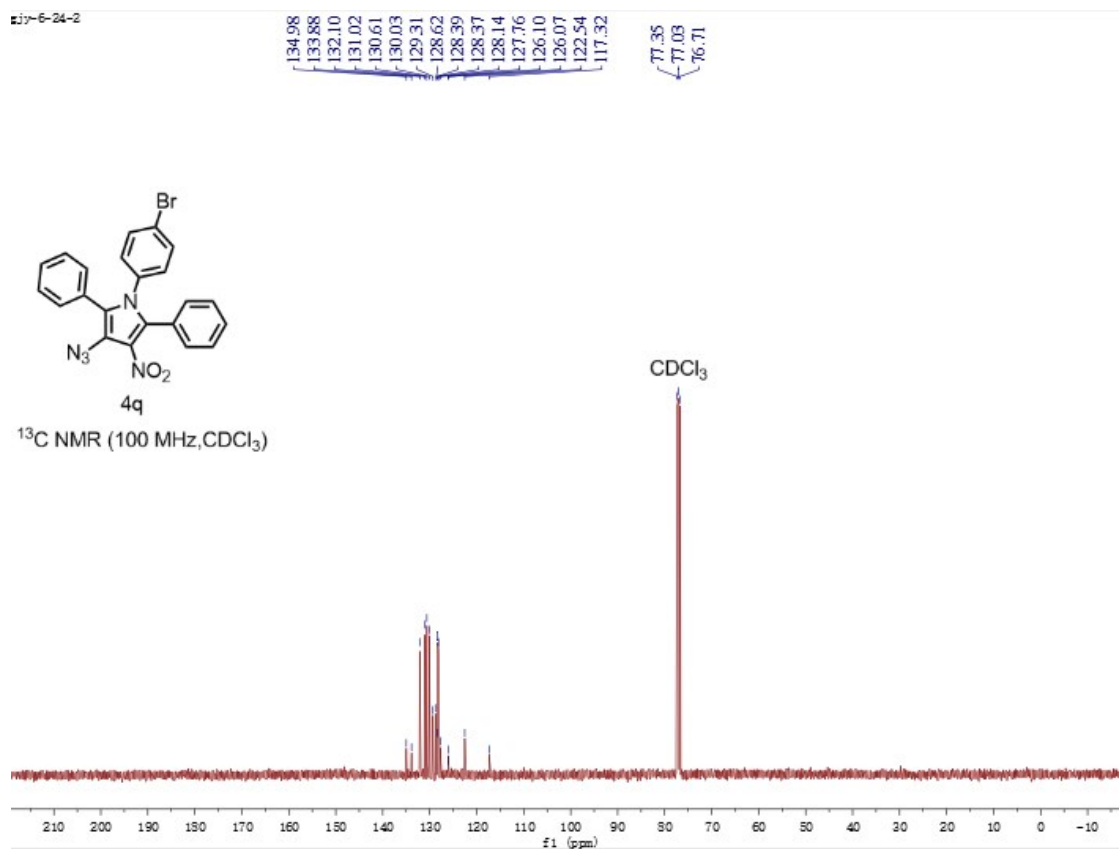



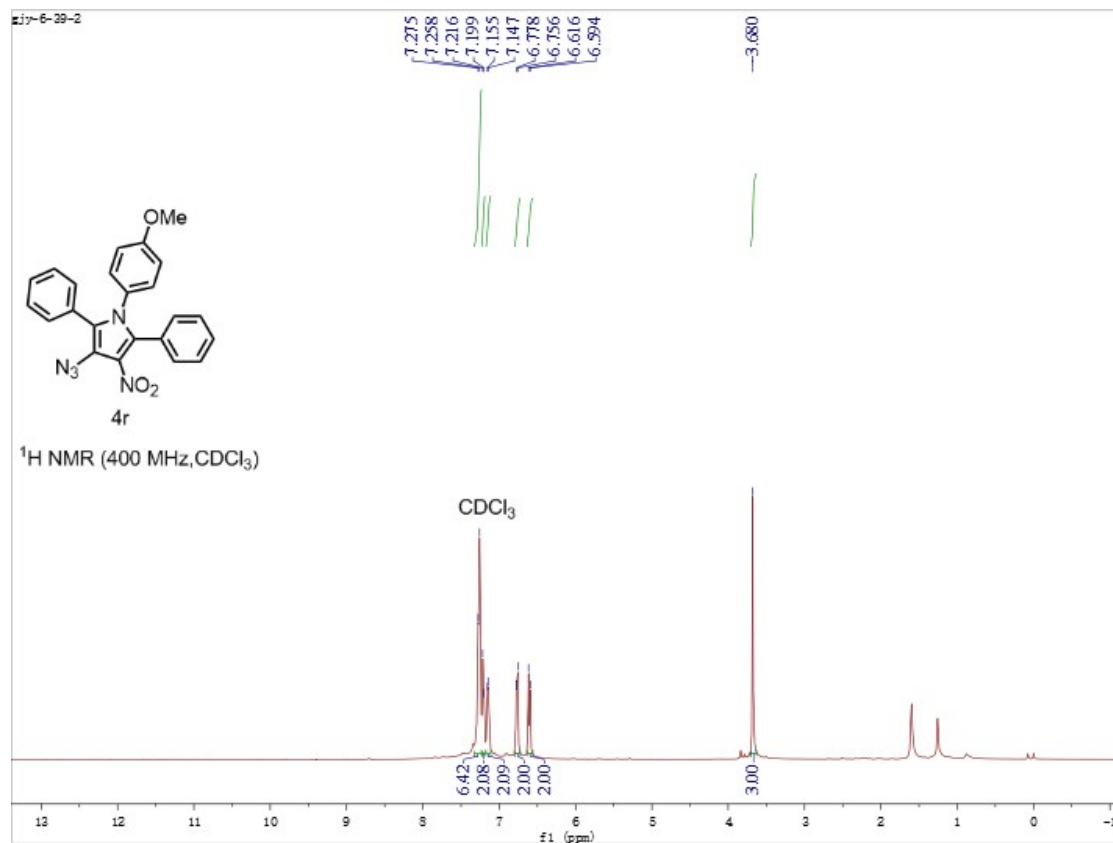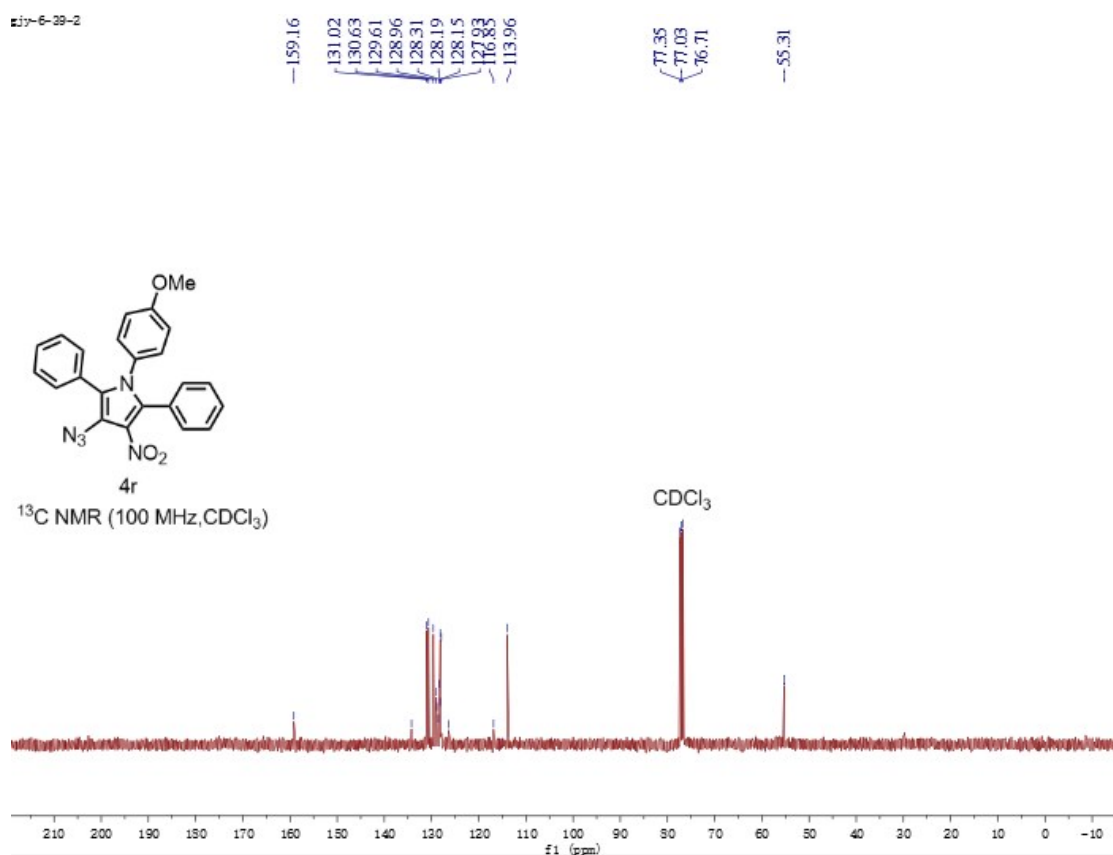

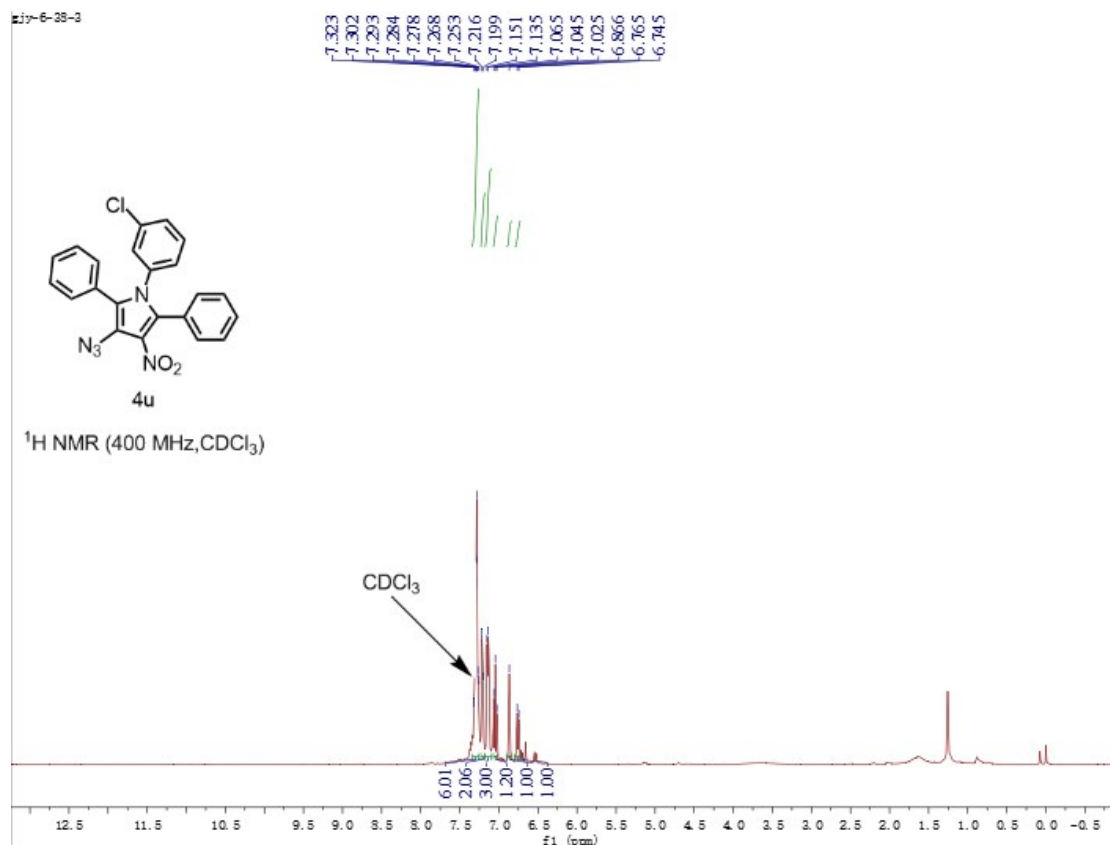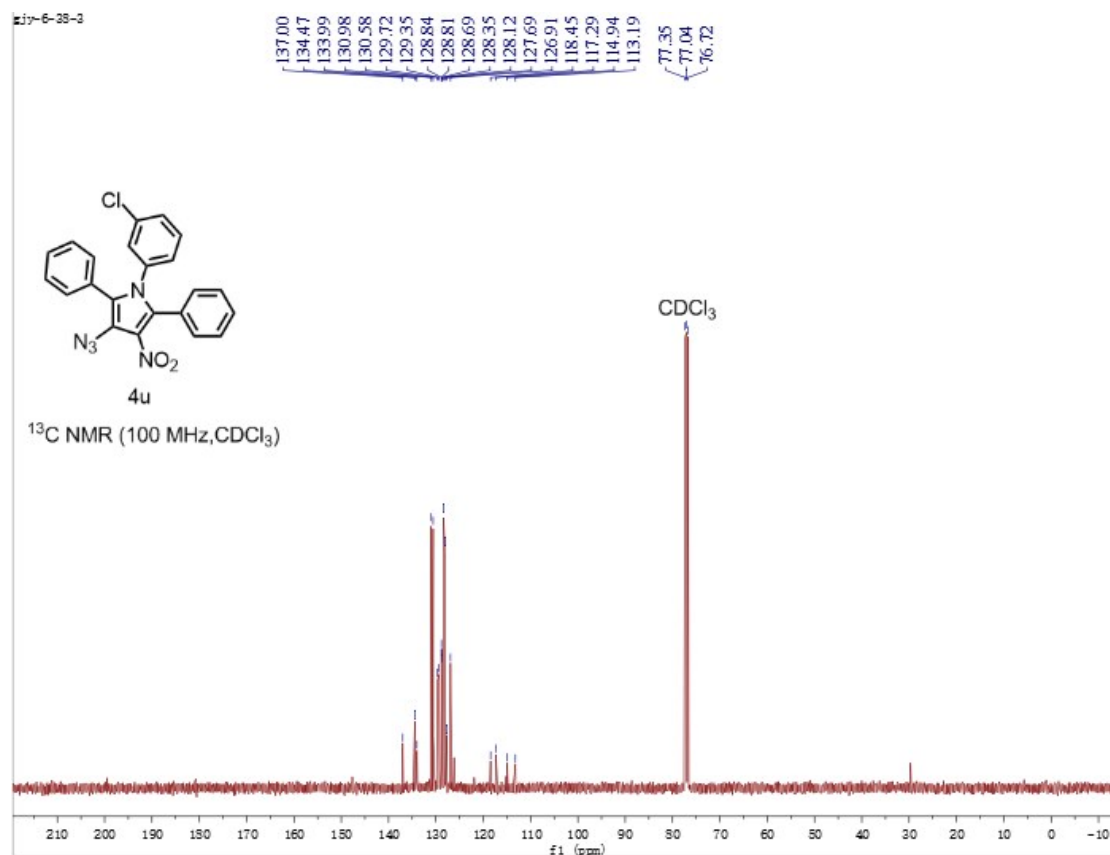

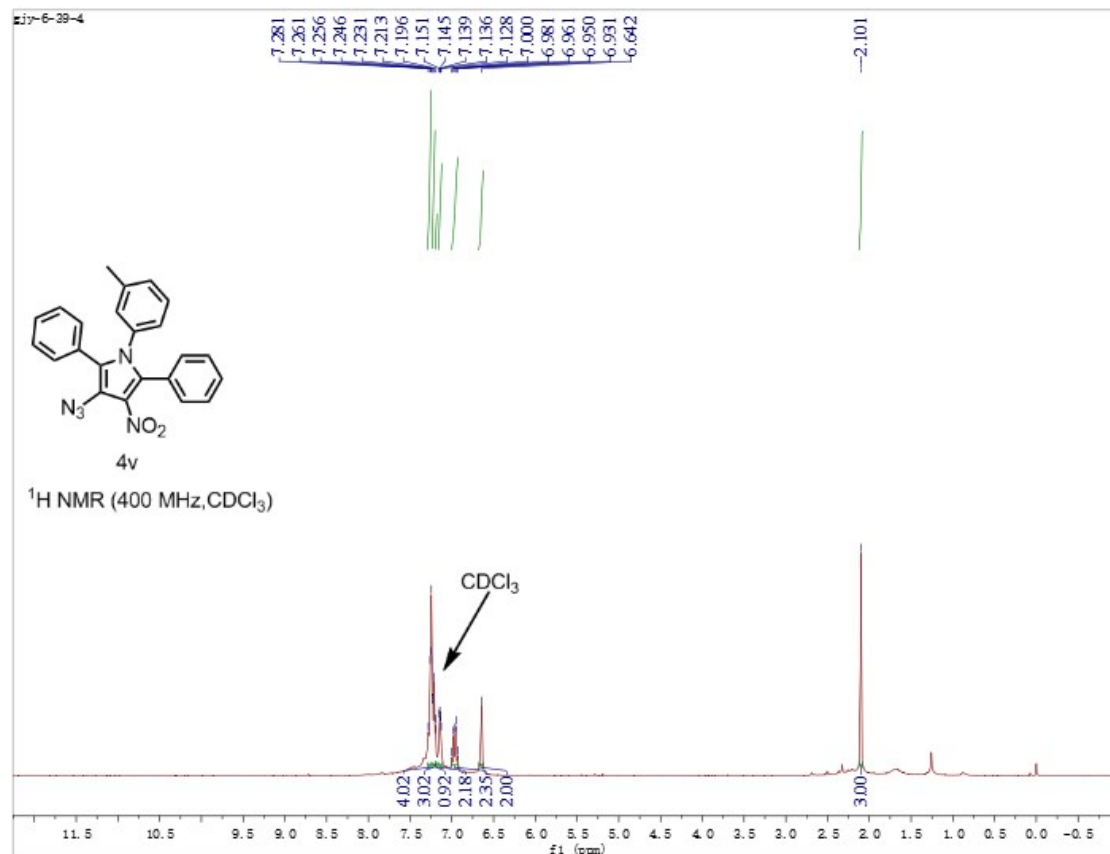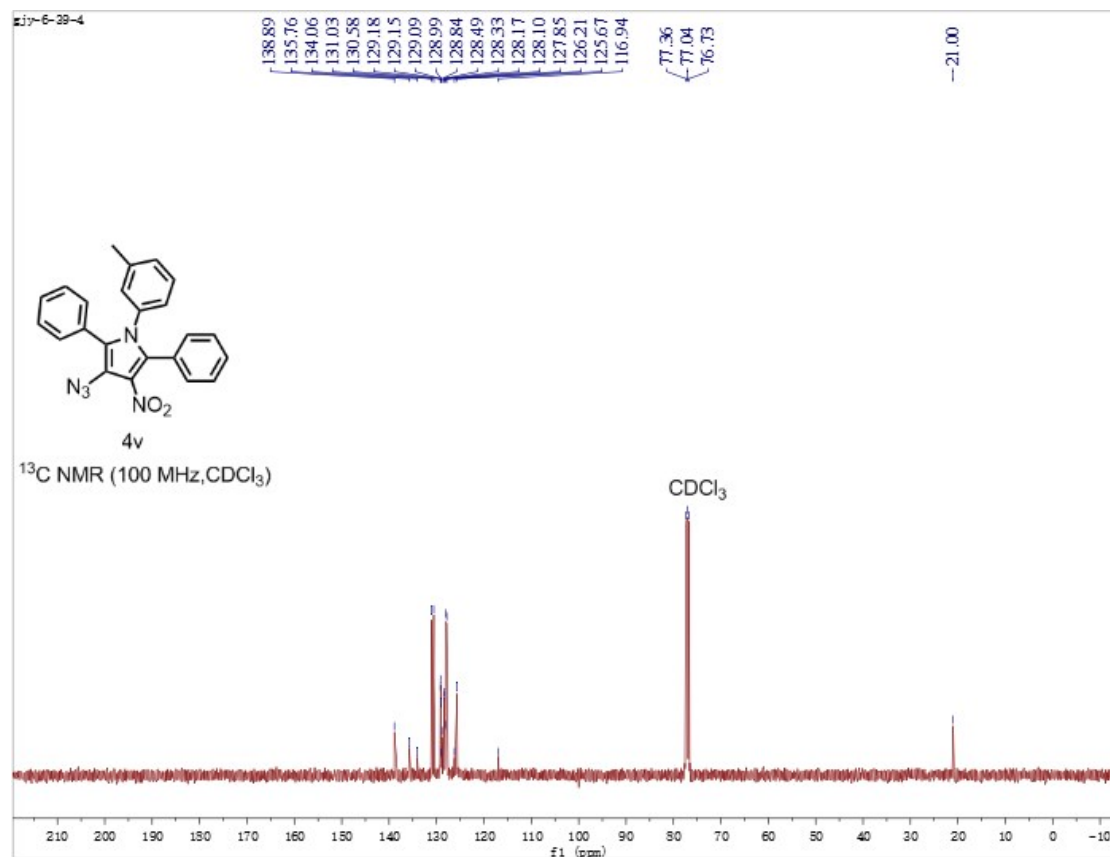

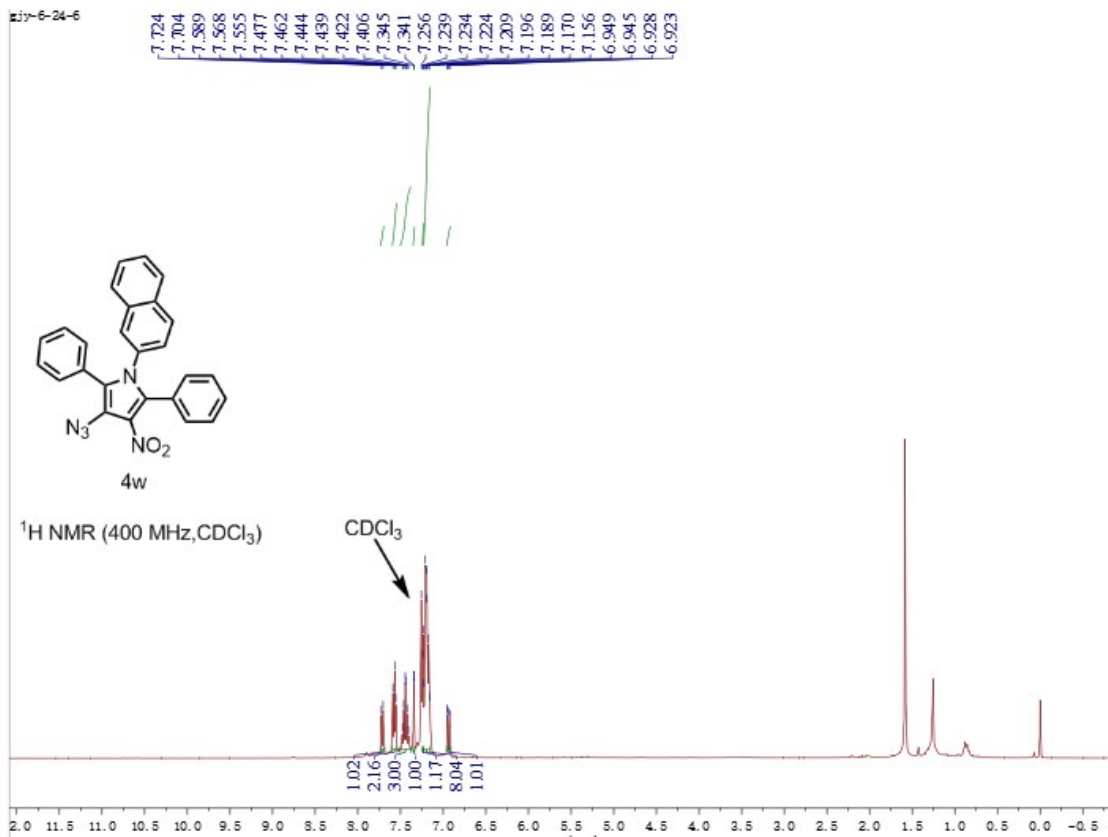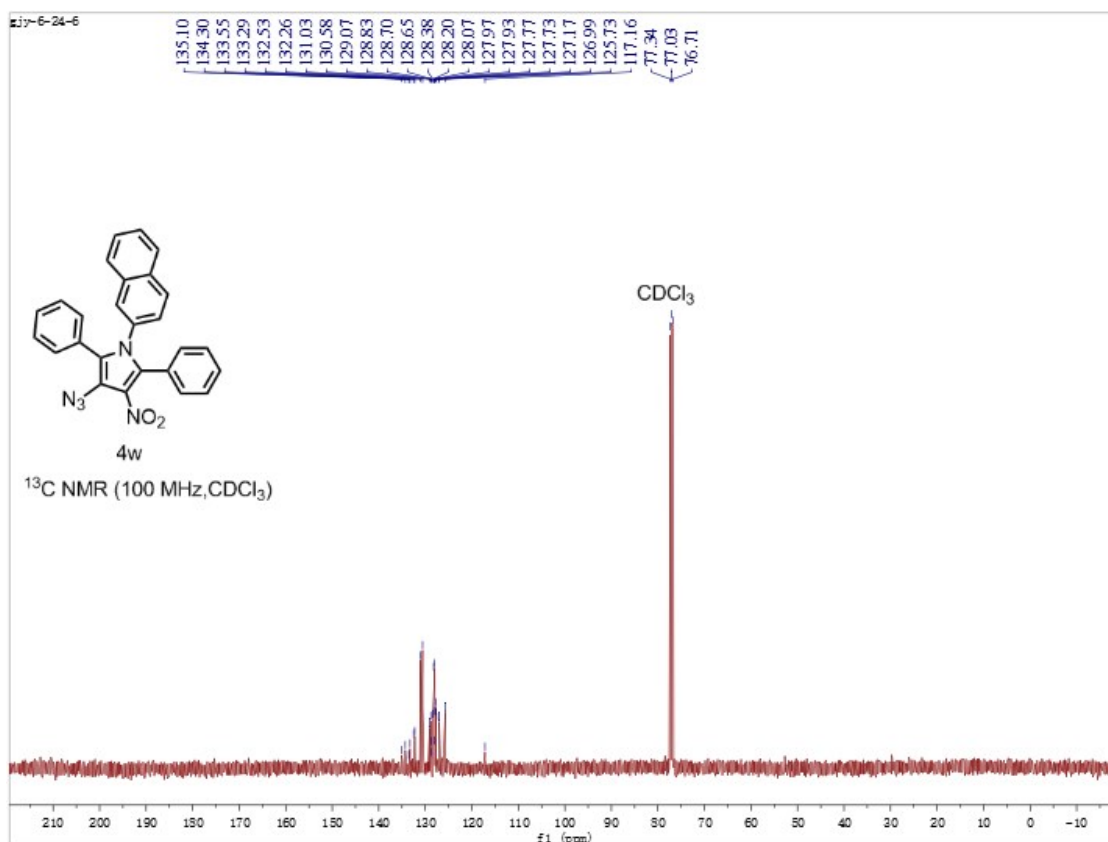

zjy-6-24-1

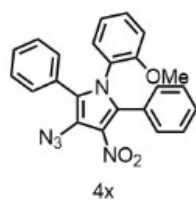

<sup>1</sup>H NMR (400 MHz, CDCl<sub>3</sub>)

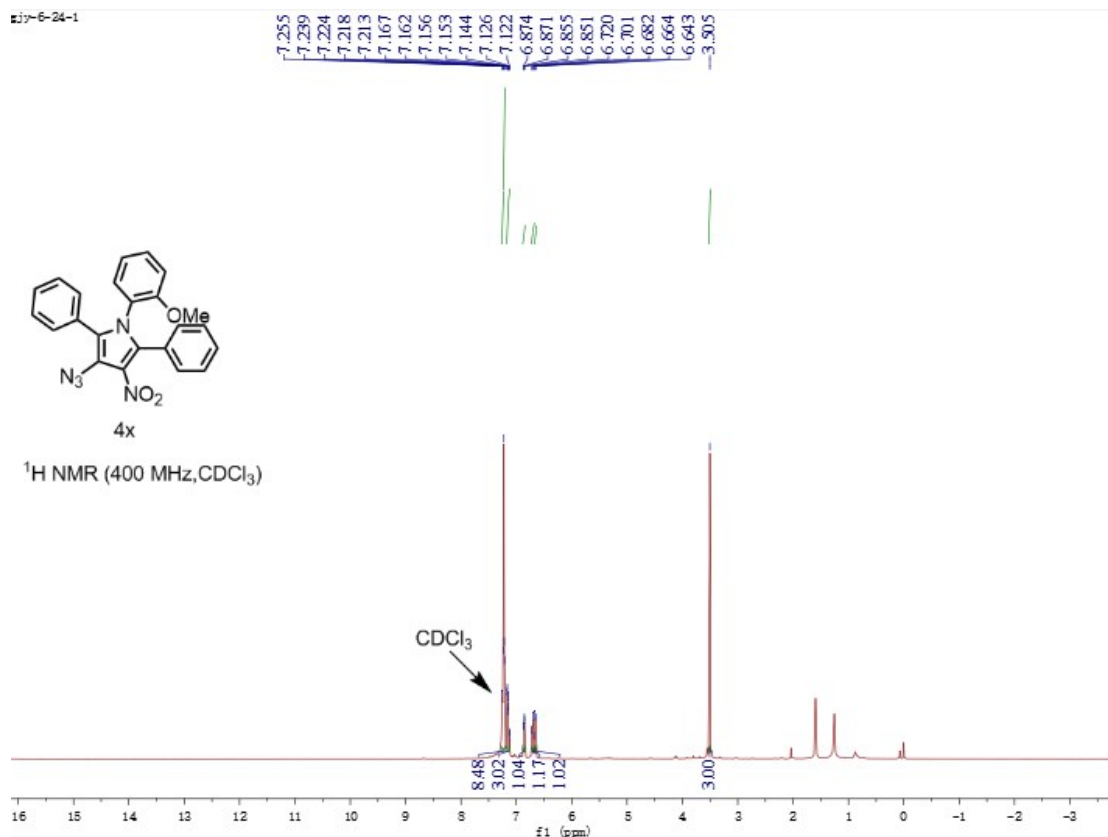

zjy-6-24-1

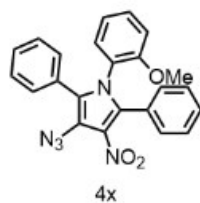

<sup>13</sup>C NMR (100 MHz, CDCl<sub>3</sub>)

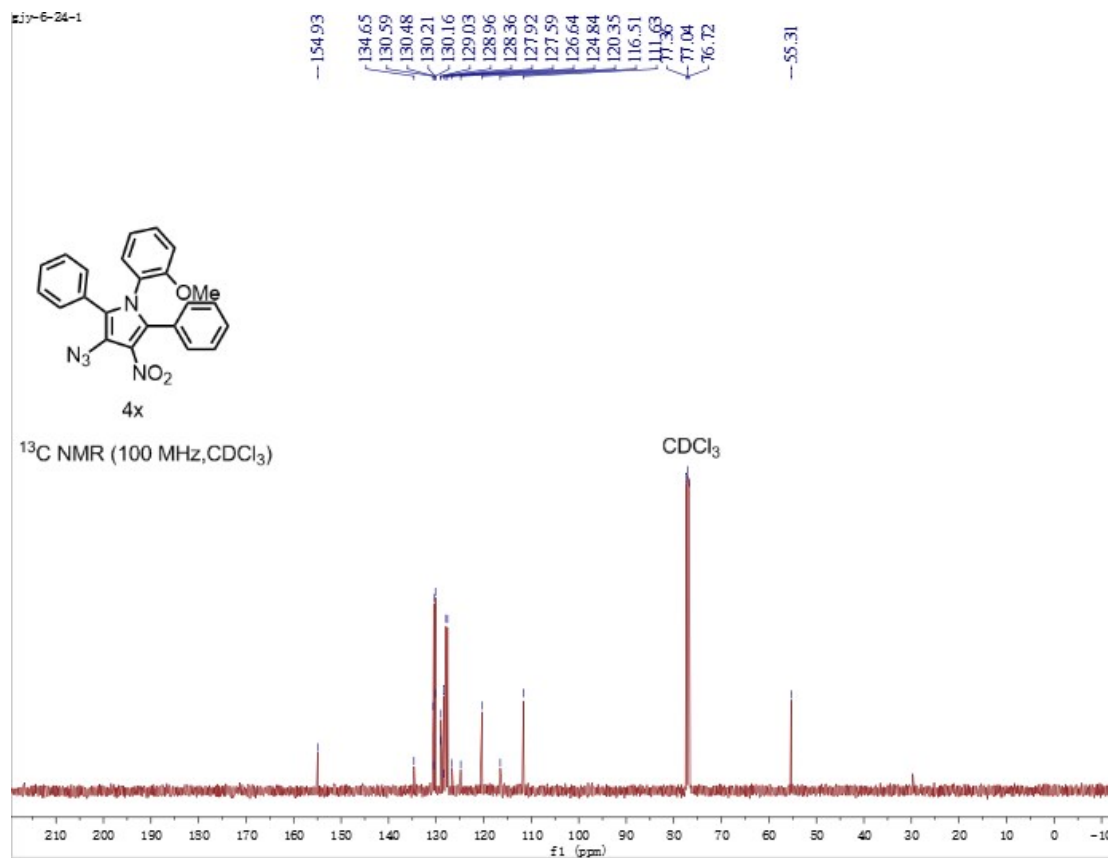

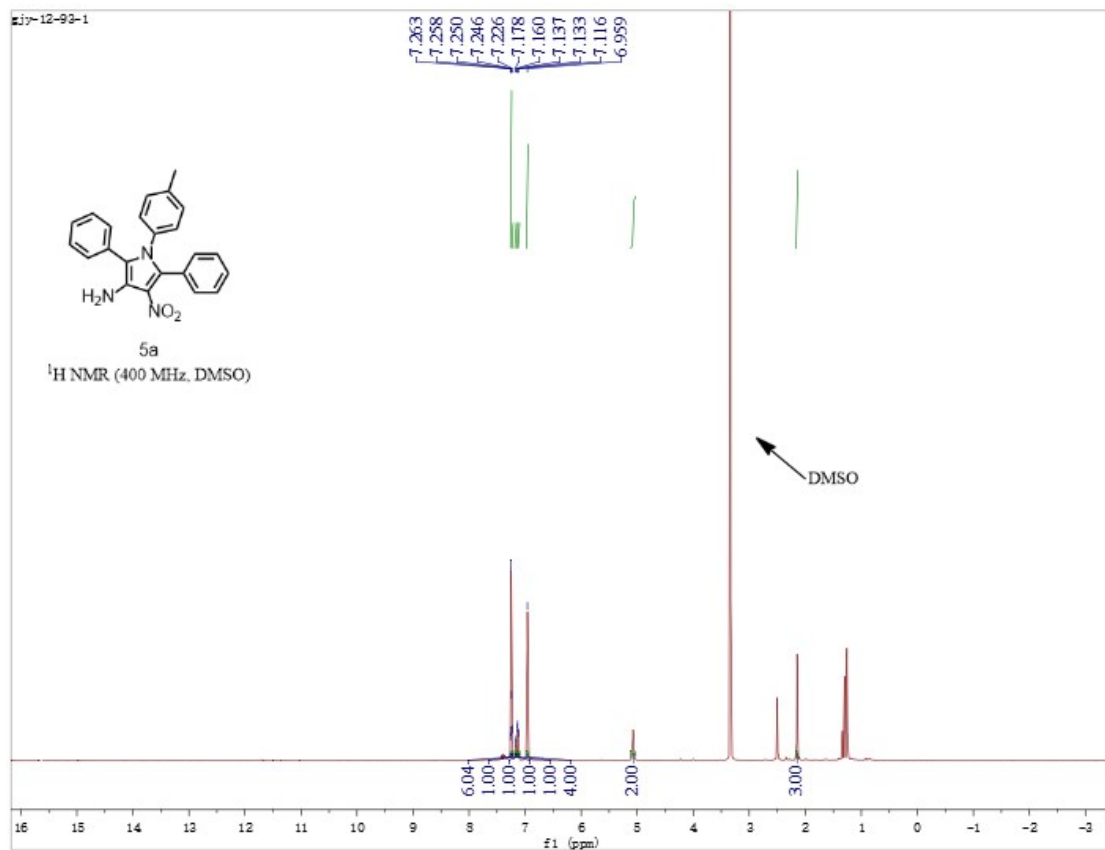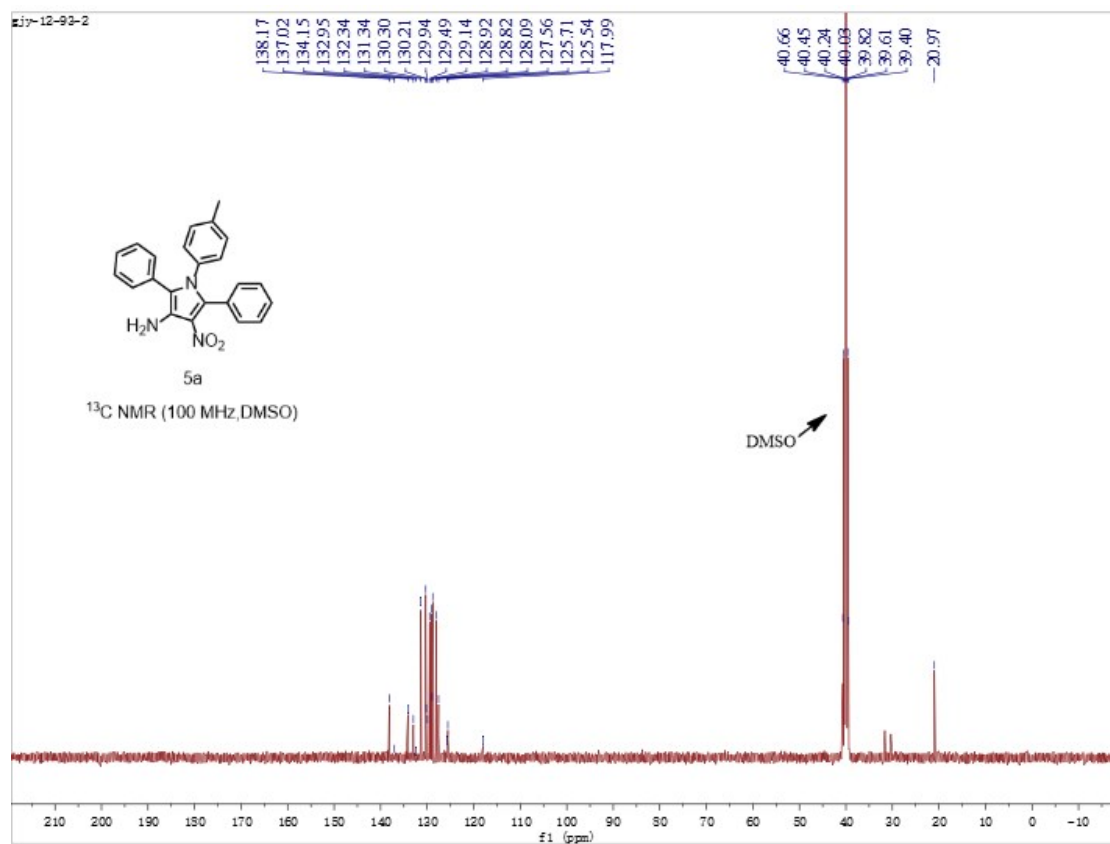

Supplement: d0ob01927e1.pdf [file d0ob01927e1.pdf]
